# Supplementary material
Source: PubMed Central journal article supplement (PMC6764874)
Supplement: NIHMS1045951-supplement-Supp_info.pdf [file NIHMS1045951-supplement-Supp_info.pdf]

Supporting Information  
©Wiley-VCH 2016  
69451 Weinheim, Germany

## Diketopiperazine Formation in Fungi via Dedicated Cyclization and Thiolation Domains

Joshua A. Baccile<sup>[a]†</sup>, Henry H. Le<sup>[a]</sup>, Brandon T. Pfannenstiel<sup>[b]</sup>, Jin Woo Bok<sup>[b]</sup>, Christian Gomez<sup>[a]</sup>, Eileen Brandenburger<sup>[c]</sup>, Dirk Hoffmeister<sup>[c]</sup>, Nancy P. Keller<sup>[b]\*</sup>, Frank C. Schroeder<sup>[a]\*</sup>

**Abstract:** Cyclization of linear dipeptidyl precursors derived from nonribosomal peptide synthetases (NRPSs) into 2,5-diketopiperazines (DKPs) is a crucial step in the biosynthesis of a large number of bioactive natural products. However, the mechanism of DKP formation in fungi has remained unclear, despite extensive studies of their biosyntheses. Here we show that DKP formation *en route* to the fungal virulence factor gliotoxin requires a seemingly extraneous couplet of condensation (C) and thiolation (T) domains in the NRPS GliP. *In vivo* truncation of GliP to remove the CT couplet or just the T domain abrogated production of gliotoxin and all other *gli* pathway metabolites. Point mutation of conserved active sites in the C and T domains diminished cyclization activity of GliP *in vitro* and abolished gliotoxin biosynthesis *in vivo*. Verified NRPSs of other fungal DKPs terminate with similar CT domain couplets, suggesting a conserved strategy for DKP biosynthesis by fungal NRPSs.

DOI: 10.1002/anie.2016XXXXX

SUPPORTING INFORMATION

---

**Table of Contents**

|      |                                                                 |    |
|------|-----------------------------------------------------------------|----|
| 1    | Supporting Methods.....                                         | 1  |
| 1.1  | Strains, media, and growth conditions                           | 1  |
| 1.2  | Gene cloning, plasmid construction, and genetic manipulations   | 1  |
| 1.3  | Nucleic acid analysis                                           | 2  |
| 1.4  | Northern analysis                                               | 2  |
| 1.5  | Fermentation and metabolome extraction                          | 3  |
| 1.6  | Analytic methods and equipment overview                         | 3  |
| 1.7  | Heterologous protein production                                 | 4  |
| 1.8  | GliP product formation assays                                   | 4  |
| 1.9  | GliP T <sub>3</sub> -pantetheine detection                      | 5  |
| 1.10 | Compound <b>5</b> cyclization assay                             | 5  |
| 1.11 | ATP-[ <sup>32</sup> P]pyrophosphate exchange assays             | 5  |
| 1.12 | Synthesis of <i>N</i> -acetylcystamine-L-Phe-L-Ser ( <b>5</b> ) | 6  |
| 1.13 | Mining for putative DKP producing fungal NRPSs                  | 6  |
| 1.14 | Gene sequences for WT and mutant GliP proteins                  | 7  |
| 2    | Supporting Figures.....                                         | 13 |
| 3    | Supporting Tables.....                                          | 21 |
| 4    | Supporting References.....                                      | 33 |

## SUPPORTING INFORMATION

## 1 Supporting Methods

### 1.1 Strains, media, and growth conditions

The fungal strains used in this study are listed in **Table S3**. Unless otherwise noted, all strains were grown at 30 °C on glucose minimal medium (GMM<sup>[1]</sup>) and, when appropriate, were supplemented with 0.56 g uracil L<sup>-1</sup>, 1.26 g uridine L<sup>-1</sup>, 1.0 g arginine L<sup>-1</sup> and maintained as glycerol stocks at -80 °C. *Escherichia coli* strain DH5 $\alpha$  was propagated in LB medium with appropriate antibiotics for plasmid DNA.

### 1.2 Gene cloning, plasmid construction, and genetic manipulations

(a) *A. fumigatus* GliP truncation and complement strains: The *gliP* C<sub>T</sub>T<sub>3</sub> or T<sub>3</sub> domain deletion strain (TJW139 or TJW140 respectively) was created in strain Af293.1 by replacing the C<sub>T</sub>T<sub>3</sub> or T<sub>3</sub> domain with *A. fumigatus pyrG* using modified double joint PCR<sup>[2]</sup> consisting of the following: 1 kb DNA fragment upstream of the C<sub>T</sub>T<sub>3</sub> or T<sub>3</sub> domain, a 1.9 kb DNA fragment of *A. fumigatus pyrG* with glutathione gene terminator (primers glutapyrGF and glutapyrGR),<sup>[1,3]</sup> and a 1 kb DNA fragment downstream of the C<sub>T</sub>T<sub>3</sub> or T<sub>3</sub> domain. 30  $\mu$ L of Sephadex® G-50 purified third round PCR product was used for fungal transformation. Polyethylene glycol based fungal transformation was done as previously described.<sup>[2,4]</sup> C<sub>T</sub>T<sub>3</sub> or T<sub>3</sub> domain deletants were confirmed by PCR and Southern blot (**Figure S11a**) and the correct transformants, TJW139.30 and TJW140.16, were used for subsequent analysis.

For  $\Delta$ C<sub>T</sub>T<sub>3</sub> complementation, pJW162 was created by inserting a 3.6 kb PCR product with *gpdA* promoter using the primer pair gliPgpdF/CTglipR and cloning the subsequent product into *Bam*HI/*Hind*III sites of pUCH2-8.<sup>[5]</sup> This plasmid was used to transform TJW139.30 to complement a deletion of  $\Delta$ C<sub>T</sub>T<sub>3</sub>. The resulting strain was called TJW178 and was confirmed by PCR and Southern blotting (**Figure S11b**). All fungal strains used in this study are listed in **Table S3**, and primers are listed in **Table S4**.

(b) *A. fumigatus* GliP point mutation: To introduce the histidine-to-alanine amino acid substitution in *A. fumigatus*, we first fully deleted *gliP* in a strain with a deleted *akuA* gene (TFYL44.1) to increase the rate of homologous recombination and decrease the amount of transformants that need to be screened to obtain the desired strain. The open reading frame of *gliP* was replaced with a copy of *pyrG* from *A. parasiticus* to complement the *pyrG* auxotrophy. To generate a construct to delete *gliP*, the flanking regions of the *gliP* open reading frame were amplified (gliP3'-F & gliP3' R, and gliP5'-F & gliP5'-R) as well as the *A. parasiticus pyrG* gene (Ap-pyrGF & Ap-pyrGR). These PCR products were fused using double joint PCR and used to transform TFYL44.1 to create strain TBTP12.02 which was confirmed by Southern blot analysis (**Figure S12**).<sup>[6]</sup> Two plasmids were then generated, one which included a full length copy of *gliP* (pBTP12), and one that contained a H1754A copy of *gliP* (pBTP13), both targeted to the *akuA* locus. The pBTP12 plasmid was assembled by amplifying *akuA* flanks (KU5'-F & KU5'-R, and KU3'-F & KU 3'-R), *gliP* (gliP-F & gliP-R), and

## SUPPORTING INFORMATION

*A. fumigatus argB* as the selectable marker (AFU *argB* fwd & AFU *argB* rev). These PCR fragments were combined with a plasmid backbone amplified from a yeast shuttle vector (YS F/YS R) in a yeast transformation to allow for homologous recombination to assemble the fragments into a full plasmid. pBTP13 was assembled using the same fragments and method, except that the H1754A substitution was introduced by using primers containing the mutation and amplifying *gliP* in two separate PCR reactions (*gliP*-F & *gliP*-H1754A-R, and *gliP*-H1754A-F & *gliP*-R). TBTP12.02 was then transformed with pBTP12 and pBTP13 to generate TBTP99 and TBTP100 respectively, which were confirmed by Southern blot analysis (**Figure S13**). TBTP12.02 was taken to prototrophy by amplifying *argB* (AFU *argB* fwd & AFU *argB* rev2) from *A. fumigatus* and selecting prototrophic transformants generating TBTP94.

(c) Heterologous *gliP* expression vectors: pET24b *GliP* was a gift from Robert A. Cramer, Jr. (Durham, NC), which was constructed as described.<sup>[7]</sup> Truncations were made by PCR and reinstalled into pET24b with the previously utilized *NdeI/XhoI* restriction sites. All *gliP* mutants were constructed by applying PCR site-directed mutagenesis on the original pET24 *gliP* as template using primers listed in **Table S4**. Competent *E. coli* NEB® 5-alpha (New England Biolabs) was transformed with the PCR reactions, which were sequenced to confirm accurate amplification.

(d) *A. fumigatus GliP* point mutation at amino acid 2095 (ser->ala) : To replace serine (TCG) to alanine (GCG) at 2095 amino acid position, we first created a single point mutation (T→G) using joint PCR. This mutated template was fused to a 1.9 kb DNA fragment of *A. fumigatus pyrG* with glutathione gene terminator (primers DgPT5'F and DgPCT3R) by joint PCR<sup>[1,3]</sup>. The fused 3kb PCR amplicon with the point mutation was used for transformation to Af293.1. Transformants were confirmed by Southern blotting (**Figure S14**) and sequencing (data not shown) to obtain TJW201.38 for the subsequent experiments.

### 1.3 Nucleic acid analysis

Plasmid preparation, digestion with restriction enzyme, gel electrophoresis, blotting, hybridization, and probe preparation were performed by standard methods.<sup>[8]</sup> *Aspergillus* DNA for diagnostic PCR was isolated using the previously described method.<sup>[9]</sup> Sequence data were analyzed using the LASERGENE software package from DNASTAR.

### 1.4 Northern analysis

Strains were grown in liquid GMM at a concentration of  $1.0 \times 10^6$  spores per milliliter shaking at 225 rpm at 30 °C for 24 hours, then 25 °C for an additional 48 h or after 24 Gliotoxin (**1**), was added at 25 µg/mL followed

## SUPPORTING INFORMATION

by an additional 24 h of cultivation. Mycelia were harvested by filtering through Miracloth (CalBioChem), lyophilized, and total RNA was then isolated using Trizol (Invitrogen). The probe for *gliG* was prepared by PCR amplification of genomic DNA, and labeled with dCTP  $\alpha$ P.<sup>32</sup>

### 1.5 Fermentation and metabolome extraction

*A. fumigatus* strains were inoculated ( $1.0 \times 10^6$  spores/mL) into 25 mL GMM in 125 mL Erlenmeyer flasks at 30 °C with shaking at 220 rpm. After 5 days, liquid fungal cultures including fungal tissue and media were frozen using a dry ice-acetone bath and lyophilized. The lyophilized residues were extracted with 12.5 mL of a mixture of acetonitrile, ethyl acetate, and water (80:15:5) for 0.5 h with vigorously stirring. Extracts were filtered over cotton, evaporated to dryness, and stored in 8 mL vials. Crude extracts were suspended in 1.0 mL of extraction solvent and centrifuged to remove insoluble materials, and the supernatant was subjected to LC-HRMS analysis.

### 1.6 Analytical methods and equipment overview

(a) NMR spectroscopy: NMR spectroscopic instrumentation: a Bruker Avance<sup>III</sup> HD (800 MHz <sup>1</sup>H reference frequency, 201 MHz for <sup>13</sup>C) equipped with a 5 mm CPTCL <sup>1</sup>H-<sup>13</sup>C/<sup>15</sup>N cryo probe. Non-gradient phase-cycled dqfCOSY spectra were acquired using the following parameters: 0.6 s acquisition time, 400-600 complex increments, 8, 16 or 32 scans per increment. Non-gradient HSQC, HMQC, and HMBC spectra were acquired with these parameters: 0.25 s acquisition time, 200-500 complex increments, 8-64 scans per increment. <sup>1</sup>H, <sup>13</sup>C-HMBC spectra were optimized for  $J_{H,C} = 6$  Hz. HSQC spectra were usually acquired without decoupling. NMR spectra were processed and baseline corrected using MestreLabs MNOVA software packages. (b) Mass spectrometry: LC-HRMS was performed on a Thermo Scientific-Dionex Ultimate3000 UHPLC system equipped with a diode array detector and connected to a Thermo Scientific Q-Exactive Orbitrap operated in electrospray positive (ESI<sup>+</sup>) or electrospray negative (ESI<sup>-</sup>) ionization mode. Low-resolution HPLC-MS was performed on an Agilent 1100 series HPLC system equipped with a diode array detector and connected to a Quattro II mass spectrometer (Micromass/Waters) operated in ESI<sup>+</sup> or ESI<sup>-</sup> mode. Data acquisition and processing for the LC-HRMS was controlled by Thermo Scientific Xcalibur software. Data acquisition and processing for the HPLC-MS was controlled by Waters MassLynx software. (c) Chromatography: flash chromatography was performed using a Teledyne ISCO CombiFlash system. For

## SUPPORTING INFORMATION

semi-preparative HPLC Agilent Zorbax Eclipse XDB-C18 or -C8 columns (25 cm x 10 mm, 5  $\mu$ m particle diameter) were used. An Agilent Zorbax Eclipse XDB-C18 column (4.6 x 250 mm, 5  $\mu$ m particle diameter) was used in the HPLC-MS analyses of *in vitro* protein activity assays. For semi-preparative and analytical HPLC acetonitrile (organic phase) and 0.1 % acetic acid in water (aqueous phase) were used as solvents at a flow rate of 3.20 mL/min or 1.0 mL/min, respectively. A solvent gradient scheme was used, starting at 5% organic for 3 min, followed by a linear increase to 100% organic over 25 min, holding at 100% organic for 8 min, then decreasing back to 5% organic for 1 min and holding at 5% organic for the final 6 min, a total of 40 min. An Agilent Zorbax RRHD Eclipse XDB-C18 column (2.1 x 100 mm, 1.8  $\mu$ m particle diameter) heated to 40 °C was used in the LC-HRMS *A. fumigatus* mutant profiling analysis with acetonitrile (organic phase) and water (aqueous phase) with 0.1 % acetic acid used as solvents at a flow rate of 0.5 mL/min. For data displayed in Figure 2 a solvent gradient scheme was used, starting at 5% organic with an immediate linear increase to 100% organic over 10.5 min, holding at 100% organic for 4 min, then decreasing back to 5% organic in 0.1 min and holding for the final 1.5 min, for a total of 16 min. For data displayed in Figure 4 a solvent gradient scheme was used, starting at 5% organic for 5 min, then a linear increase to 100% organic over 15 min, holding at 100% organic for 5 min, then decreasing back to 5% organic in 0.1 min and holding for the final 2.9 min, for a total of 28 min.

### 1.7 Heterologous protein production

All C-terminal hexahistidine-tagged GliP mutants, and truncation expression constructs were used to transform *E. coli* BL21(DE3) (New England Biolabs), which was grown in Terrific Broth (TB) supplemented with 10 mM MgCl<sub>2</sub> and selected with 100  $\mu$ g/mL ampicillin. 10 mL overnight cultures were diluted into 1 L of TB in a 4 L flask and shaken at 200 RPM at 37 °C to an OD of approximately 0.75, cooled to 16 °C and further grown to an OD of roughly 1.0-1.2 and induced with 100  $\mu$ M IPTG. Cultures were maintained at 16 °C at 200 RPM for an additional 24 hours before harvesting at 5,000 x g (4 °C for 10 min) and stored at -80 °C until purification. All further steps occurred at 4 °C unless otherwise noted. 20 g of frozen pellets were resuspended in 150 mL of 25 mM Tris pH 8.0, 500 mM NaCl, and sonicated. Lysed cells were spun at 20,000 x g for 20 min, and the supernatant was collected and gently stirred with 1 mL HisPur Ni-NTA Resin (Thermo Fisher Scientific) for 30 min. During incubation, 5  $\mu$ L of Benzonase (EMD Millipore) was added along with 1 mM MgCl<sub>2</sub>. The slurry was loaded and passed through a column and the resin was washed with 20 column volumes of fresh lysis buffer. The protein was then eluted with 30 mL lysis buffer containing 150 mM imidazole and 10% glycerol. The elution was concentrated with an Amicon Ultra-15 30 kDa spin filter (EMD Millipore), flash frozen over liquid nitrogen and stored at -80 °C until further purification. FPLC purification of proteins were performed using a HiLoad 16/600 Superdex 200 preparatory grade column run

## SUPPORTING INFORMATION

---

on a Amersham Biosciences P-920 pump equipped with a UPC-900 detector and a Frac-950 fraction collector (GE Healthcare) with a running buffer of 20 mM Tris, pH 8.0, 50 mM NaCl, 2 mM MgCl<sub>2</sub>, and 1 mM DTT. Fractions containing the protein of interest were combined and concentrated with an Amicon Ultra-15 30 kDa spin filter and flash frozen over liquid nitrogen and stored at -80 °C until further analysis was required.

### 1.8 GliP product formations assays

GliP assays were first pantetheinylated in 75 mM Tris pH 8.0, 5 mM MgCl<sub>2</sub>, 300 μM coenzyme A, 1 μM Sfp synthase (New England Biolabs), and 1 μM GliP (or GliP mutant) in 100 μL reactions at 25 °C for 1 hour. Following Sfp incubation, an additional 100 μL solution of 10 mM ATP, 800 μM phenylalanine, and 800 μM serine was added to initiate catalysis. Reactions were monitored with low-resolution HPLC-MS, as described above.

### 1.9 GliP T<sub>3</sub>-pantetheine detection

1 μM GliP in 100 μL was incubated with 75 mM Tris pH 8.0, 5 mM MgCl<sub>2</sub>, 300 μM coenzyme A, 1 μM Sfp synthase at 25 °C. After 1 hour, proteins were digested with 1.5 μg of sequencing grade chymotrypsin (Promega) for 12 hours. Peptides were then reduced with 5 mM DTT for 20 minutes at 50 °C, and thiols were capped with 15 mM iodoacetamide. Formic acid was added to 1 % (v/v), and peptides were prepared with 100-μl Pierce C18 Tips (Thermo Scientific) per the manufacturer's protocol using 100 μL of the elution solution. Peptides were identified via LC-HRMS, as described above.

### 1.10 Compound 5 cyclization assay

1 μM GliP\_S555A\_S1582A in 100 μL was incubated with 50 mM Tris pH 7.5, 5 mM MgCl<sub>2</sub>, 100 μM coenzyme A, 1 μM Sfp synthase at 25 °C for 30 min. Catalysis was initiated with 1 μL of 100 mM **5**, and after 10 minutes the reaction was quenched with 100 μL acetonitrile and immediately frozen over liquid nitrogen. Samples were thawed only immediately before HPLC analysis. Analysis was performed with low-resolution HPLC-MS, as described above.

## SUPPORTING INFORMATION

1.11 ATP-[<sup>32</sup>P]pyrophosphate exchange assays

The reactions were set up in a total assay volume of 100  $\mu$ L at 25  $^{\circ}$ C in 100 mM phosphate buffer, 5 mM MgCl<sub>2</sub>, 125 nM EDTA, 5 mM ATP, 100 nM purified GliP proteins, 0.1  $\mu$ M [<sup>32</sup>P]pyrophosphate (50 Ci/mmol), and 1 mM amino acid substrate were added. The reaction proceeded for 30 min before it was stopped (1 % (w/v) activated charcoal, 4.5 % (w/v) tetrasodium pyrophosphate, 3.5 % (v/v) perchloric acid) and further processed as described.<sup>[10]</sup> Pyrophosphate exchange was quantified on a scintillation counter (PerkinElmer TriCarb 2910TR).

1.12 Synthesis of *N*-acetylcystamine-L-Phe-L-Ser (5)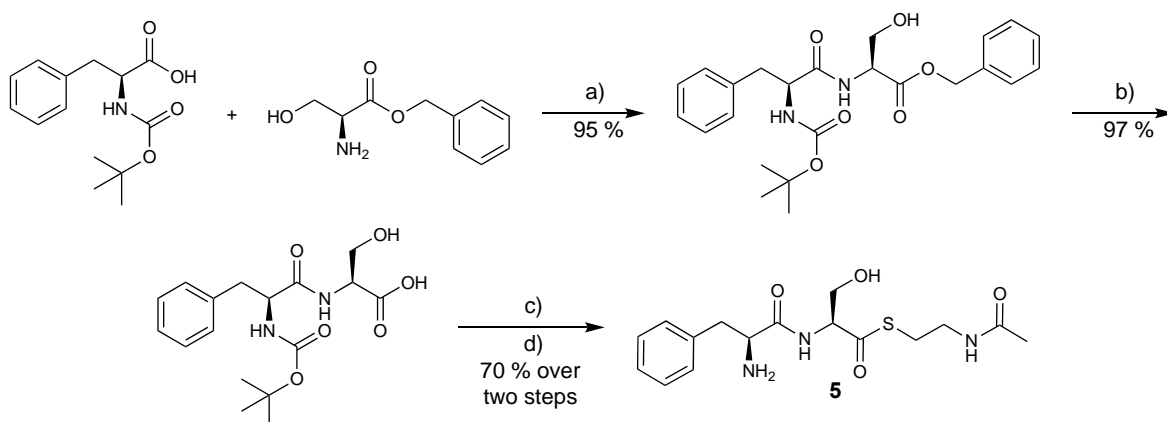

a) EDC (1.2 eq), HOBT (1.2 eq.), DIEA (3 eq.) DMF, 24 h. b) H<sub>2</sub> (continuous stream), Pd/C (10 mol %), 1.5 h. c) *N*-acetylcystamine (1.5 eq.), EDC (1.2 eq.), HOBT (1.2 eq.), DIEA (3 eq.) DMF, 24 h. d) 40 % TFA, DCM, 1 h.<sup>[11]</sup> e) 1 M phosphate buffer, pH 8, 48 h. See below for NMR assignments and spectra of 5.<sup>[12]</sup>

1.13 Mining for putative DKP producing NRPSs with ATCATC<sub>T</sub>T<sub>C</sub> domain architecture (Table S1).

GliP (accession: AAW03307.1) was used as a query sequence for a blastp search of NCBI's Fungi (taxid: 4751) non-redundant protein database using the default parameters with a total of 20000 subject sequences. The resulting hits were exported to an excel sheet and dereplicated (for multiple alignments to the same sequence) and sorted for size (2100-2300 amino acids) to obtain NRPSs with the correct domain architecture. The resulting sequences (156) were parsed with Python to search for the conserved residues "SHXXDXXS/T" in the C<sub>T</sub> active site, which yielded 89 sequences that were manually curated to ensure



## SUPPORTING INFORMATION

correct domain architecture and to remove homologs >95 % similarity to GliP, which likely produce gliotoxin. The resulting 56 putative NRPSs are annotated in **Table S1**.

#### 1.14 Gene sequences for GliP-WT and mutant GliP proteins.

##### GliP – WT (AFUA\_6G09660)

ATGCCATCAGTAGTAGCGCTCGACCTCTGCCAGCTTTTTGACCGGTCCGTCGCTCGGACACCACACC  
 AGCTGGCAGTGCATCATGAGAGCGGCTCGCTCACCTATACCGAACTCGATGTGGCCTCATCGAACCT  
 GGCCCGAAAGCTAAAGCAAGAAGGAGTAGTCCCTGGGGAAGCGGTCTCTTACTTACTGAGCACGG  
 CACCCGGAATGTTGTGCGCTGCTTGCCATCCTCAAGGCCACGCCTGCTACGTTCTCTGGACCGC  
 AGCTCGTGGTCATCAGAGCGGATCCAGGCCGTGCTGGACGGGACAGACAGCCGGATTCTGATCAAC  
 ACAACCGTCGAGCCGTTGAAAGCCCGCGGCACAAAGTCATCCATCTGACCAGCGCCGATGTGACG  
 ACTCTATCGACGGACCGCAGCACCACAAAGGTCATTCCCAGACATCGCTCCCGAAGACCTCGCTTGTT  
 TGATCTTTACCAGTGGGAGCACAGGTGTGCCAAGGGAGTCATGATTCCACATCGTGCCGTAGCCAA  
 TTATGCTCAGACCAGTCCATTCAACATGGATGTGCAGCCGGGAGACCGGGTACTGCATATCCTGTGC  
 GTATCCTTTGATGCCTCTACGGGCATGCTGTTTTCCATTCTAGGCAACTCGGGCATCGTGTTCCCG  
 CCACGATGGACACCCTCTTCGACAAAGCGCAGTCCTGCTCCATCCTCGCGTCGACGCCGTCAATCCT  
 GGCAACTACTCCCTGCCGACGGCCCTGCCAGACAGCTATCCCTACGTCCATACTATTCTGTTGGGT  
 GGAGAGTCGCCACCCGCCCGCTGTTGTCCAGCTGGCTTCAATTCGGCGTTCGCATCCTGAACGCG  
 TACGGTCTACTGAAACCACCTGTGCCTCGTTGATGCAGGAAGTAGAGGTCTGTGAGGAGACGGGAA  
 TGATCAATCGCAGTATTATCGGTGCCCCAATGCCCAATGGACCGGTATACCTGCTACAGCCGGATAC  
 GCTCCTCCCGGTGCAGGAAGAAGGCGAGGAAGGGGAGATTGCCATTGCGGGCGTCGGCCTGGCCC  
 ACGGCTACTACCGAAATGCCGCACTAACAGCCGAGAAGTTTATCGAGTGGCACGGCAAGCGAGTCTA  
 TCGCACCGGCGACCAAGGACGGTGGACACGCCGTAACGACGGCCAGCGCGTGGTGGAATTCCGCG  
 GCCGAGTGATCGCACCGTCAAGAACC GCGGATTCTCGTCAATCTACCCGCCGATGTGAGGAAC  
 CGCTACGCCAGATGGGCTTCGGTGTACCGACGTCTATGCTTCGCTGATCAACGGTCTCTTGGTTGC  
 GCTGGTGACCCCGGCAACTGCAGATCTGGACGGCCTGCAGAGCGAGGCGGACCGTCCGGCTGTCTT  
 CTTTCCATCGGCCGGGACGATACTTGGCTGTGATCAGTTTCCACTGTGAGCCAACGGCAAGATTGA  
 TACCAAGGCCATTGAGAACATGCTGAAAGAGTATCAGGCGCGTCTCTGCGAGGGCACCGATGATGAA  
 GAGACCACAGGGGGCGAGCGTCTACGGAGCGCGAGCAAGTCATAGCCGAATGCATGTATACCGCG  
 TTGGGGTTGGATCTCCCGTCGGCGTCGGCGTCCAAAGATTTCAATTTCTTCGCCATGGGCGGAAACT  
 CCCTTGCTGCTCTTCGATTACCTCCCTGTGCCGTGAGCGAGGCATCCTCCTCACTACCCGGGATCT  
 GTACCTACATCCAACAGTCAGAGGCATTCTCCCGTATGCTCGTGACCTTGCTCATTCTGGTCTGCCTT  
 TGCCAGACAAGGAGGAGCAAATCGACCACCGATTATCCCTCAAGGCCGAGGTTGCTGCGGCCCTTC  
 ATCTCTTGGGCGACATTGACGTCGCTCCGTTGACTCCCCTTCAGCTACAACCTGAGCGCTCCTATTTTC  
 CAAAGCGATGGGACCAACACGAACCAGCTGCGGCAATCGTATCCCCTGGCCTCGGCCGAGCACATC  
 TGCAATGCATGGCGACAGGTCGTCCTCAGTGAACCGGTCTTCCGAACGCAGATTGCGCTGGATATCG  
 GGCCCGGTGTGCAGATCGTTCACGCTCAGCCACGGTGCCAGCCGCAGGAGATTACCTTTCACCGCC  
 GGAAGACTACAATGCTGCCTTGAGCGATCCTTCCCGTCTGCCGTTGGACTGGGAATGCGTTTGA  
 ATTTATGAAATTTATGCCGAATGACGACGATGACGACGAGGGTGAAGTGAAGTGTGCTGACGGCC  
 CACCACAGCCTGATCGATGGTTACTCCCTGGGACTCATTCTGGCTCGGGTGCAGCAGGCAAGCCAG  
 GGTGTGCGATCCTCCCGGTCTCTTCTTTGTAGACGCAGCGTGGAACTGCTGAGCGTGCAGAAGC  
 AGAGAGACACCGAGGCACGGCGGTTCTGGGAGCAGTATCTGCAGCCGGTACGGTCACTCACGAAAG  
 CAGAGGCAACCACAACGCCTGTAGCACGGCCGTACCTCGCTCAGGAGGTGCTGTTCAAGCATGTGG  
 GCGGCGTGGACGAGTTACACCGACTCGCATCCAGCTGCAGTGTACCCTAGCGGCCGTCTACTACA  
 CGGCGTGGGCCATGACGATTGCTCGGACGACCAAGTCCACCCTGGTAACTCTGGGAGTTGTCTTCTC  
 TGGCCGCGAGATCCTCCAGACGATGCGCAGGCCGTGCGCCCATGATGGCCACTCTGCCCTGGT  
 ATGCCGATTGACGGAGAAGCCTCGATTGAGCGCCAGCTGCAGACCACGTTCCGAAGGTTTGGCAAC  
 CATTAGCACCTACGCATGGTCTGCCCCAGATCAAATCGGGTACCGGGTGCAGTCTCTGCTGGCGACG  
 CAGTATGATTTCCAACCTACGACCAACCCATCCCGCCGCAAAGGAGCAGTTCTTCGAGAACACGA

## SUPPORTING INFORMATION

CCTTTGCGCTGAGTCTCCTGGTCTGAAGCTGATGCTCGTTTTCCGCTTGGTGTACAATCCTTCCGTGCA  
CGGCGAGCAGACGGTCCAGCAATATGCCGACACGTTCCAACAGGCCCTCCAAGCGCTGGTGGGTGA  
TTCGACGATGGAGGCATGGCTCACGGGGCCGACAAAAGCACCGCTTGCCGTCGACCAAGCTTCTGA  
TATCCAACATGTCAATGTACCGAATGTGGCGTCGGCGTTCTATGCCTCGGTCGACCTCCACAAGGAT  
TTGATTGCCGTAGACGGACCAGGAGGCACGTTACCCTACCGGGAACCTGGATCAAAAGTCGAACGCG  
GTGGCCTCGCATATTGCCAAACACTTCAGCAGGGCTCAAGTCATCGCCATCCACGCCGATGGAACCC  
TCAACTGGGTTGTGGCATCCTGGGTATCCTGAAAGCCGGCTGCGCATACTGCCACTCGATCCTGC  
GTATCCCATCGCGAGACGGGTGCTGTGTACGAACAAAGCGGTGCCAGCGCGCTCCTCATCCCTAA  
TGCCTGCTCATCGTCCGCGGCCCTCCTGCCGATAACCGATCTTCGCGTCTTACGATTCAAGAAACC  
GAGACAAGCGACACAAGCAGACAGCCATCGCTGCTCGAAACGAAATGAGGATGCCCTCATCGTCT  
TCACCTCCGGCAGACCGGCCGCCCAAGGGGGTCCCCATCAGTCACAGGGGCCTTCTGGCTTTGC  
AGTCGAATCCCGAAGCCACCATGTTTCAGCCGTCCCGGTGCTCGTATAGCTCAGTTCATGTCGCCTGC  
GTTTCGACTACTGTGCCAACGAGATTTTCTCTGCGTTGCTGCATGGCGGAACCTTGGTGTTCGGGAC  
CCGTCCGACCCCTTGCCCATCTCGGAAGGTGATGTGTGACAACTTACTCCTTCTGTGCTCAGCG  
TGCTGAATCCAGACGACTATCCTAATCTCGACATGGTCTATGCAACAGGAGAACCCGTCACGCCCGG  
CTTGCTCGCTCGATGGGGCGAGGGCCGGGCATTCTACAATGCCTATGGTCCTGCAGAGTGCTCTATT  
TGCACGTCAATTTACCCGCCTAGAGCCCAGGAGGTCACCATCGGAAACGCCGTTTCGCACCGCG  
CGCATGTACATCCTGGACCCGGATCTCCAGCCCCTGTCGGACGGCCAAACCCGGAGAGATCTTCTG  
GCCGACAACAGGTGATGCGAGGCTACGTGGGAGACGATGCCAAGACGGCCTACAGCGTGCTGCC  
GGATCCCTGGCATCCTGGTGAGCGGATGTATCGCACCGGCGACTACGGCTACTGGAACCGCGGACAG  
ACAGATTGTCTACATCGGACGACTGGACCCGGCAGGTCAAATCCGTGGCTTCCGCGTCGAGCTCGC  
GGCGGTGAGCAGAAGATGTACCAAGAGGAGCCGCGGCTTACCCAAGCGGCGGCTCTCGTTGTCAA  
CGATACTCTGGTGGCCTTTGTATGCCGCTTGACGTGGATGTCAGCCGTCTGGAGCAGCGACTGCG  
CGAGTCCCTCCAACCCAGCTGGGTGCCTCAGGTGATTACCGCGCTGGAGGAGTTCCCTTGGACGGC  
CAACCGCAAGGTTGACTATCGCAAGCTGGCGGAGAGAGCCACCCTGACGCGGCCGGAGGACTCCCT  
GCCGACGAGAAGACGCCAGCAGGGATGACGGCAAAGGATGCTTCTATTGCGGACGGAATCGCAAC  
CCTGTGGAAGAACGTGCTGCGTCTGCAGGCAGGCGGCGGCTCTCGCAAGCTCTGTGAAGATGATGA  
CTTCCGTGCTCTGGGCGGCCATTCCGTTCTCCAGATGATGTTGGCGGCTCGCCTCGGCAGCACATTT  
GGCATCTCCGTGTCGATGCGCGATGTGATCGAGCACTCCACGCTGGCCGAGCAGGTGAGCTGGTG  
CGCCGCAAACGTCAGGCCTCGACGGCCAAGCCACGGACCATCTGCGACGCGTTTCCCGACCACTGC  
CTGTGCGCGTTGGAGCGTCAGACGTGGTTCCAGTACCTGATCGCTGCTGACGTGCGCACGTTCAACA  
TTCCCGTCTCTTGCATCTCGGCGGGACATTTGACCGCGACCGTCTCGTGCAGTCATTCAACGCCGT  
GTTGGCGTCACGCAAGATCTTCCGGACCAACTTTGTGCGAGACATCACTCGGACCGGTGTCGGATCTTC  
CGGGACACGCCGCCCGAGTCCTTGTGTGCGACGGTGCCTCGACACGACCAAGGAGATCGACCG  
GAGCTTTGACCTGGCTCGGGATGAGCTGATCCGCGTCTTCCCTGGACCGTGCACCCCTCCTTGTGGTT  
ACCAGCCACGCCGTCGCCGATCTCAACAGCGTGCAGAATCTGCTGCAGGACGTCTCCGGCGTGATC  
GCGGGAAGGACGACCCCAACACCCGACCGATGGCACTATCCCCGGGCCCGGCCTGGTCCCGTCA  
GGCCACAGAGCAGGAACGGAAGTTCTGGTCAAGTATCTCGAGGGGGCTCCCAGCGTCTGGACAT  
CCCGCGGTATCCCAGCAAATGGCGTTTGAAGGCCGCTCGCGCGTGTCCGAGTTCAAAGGCGACCT  
CGTTCGACGCGCCGTCCTGTTGGGGCAGGAACATGGGTTGAGTCAGCACCCAGCTGGTGTGTGCCG  
CGTCGCGCAGACCCTCCAGTGGCTCGCCGGCTCGAACGACGTGTTCTCGGCTCTCCGTGGGCCAA  
CCGCGGGCACACCGTGGAGCAAGAGTCGATGGGTCTGTTCCCTCGATCGCCTGCCTCTTCGTTCAA  
AACCCCTGTGAATGCAGACTGCGCCACCATCCTGCAGTCTACGCGTGCAGCGAGCCAGGCAGCCGT  
CTGCAATTCATTCCATTGAGCAGGTCTGAACCTCCTCCACCTGCCGCGGACCATCCGGCAACAC  
CCGCTGTTCAAGCCATGGTCACCTTTTCATCTCAAGGGGGCAGTGAAGATTGTCTCGCCATCGAGG  
GGCTGGAGGTGAAACGCGAGATGTGCTTTGCGTCCGGGGCCAAGTTCTGCTCATGTTCAATGGA  
CCGAGATCGAGGCGGATCACTGGACCCCTGCGCATCGAGTATGACGACCACCAGCTCGACGACGCGA  
CCGTACCCACCATCGAGGACAGCATCCGATGTGTCTCGAAGGGCTGGCGGATCGGCTCTCTCGCG  
CCGCCATCCACGAGCGCCTGAACGCCATGCACAAGACGGCCAGGACCAAGGTGGATTGGAACCTCT  
ACCGCCGGCTGGTGGGCATTCTGCAGCGTGAGATGGCGACCTGTCTGGGCGTCTCGCTGGATGAGT  
TCCCCTGCTCCGTCTCCTTCTTCGAGGCCGGCGGCGACTCGATCCAGGCCTGGCGGTTGAGCCGTC

## SUPPORTING INFORMATION

AGTTGAAACGGGTTGGGCTGGAGGTGCCCATCTGCAACATCTTCGATCATCCCACGGCGCAGGATTT  
GGCACAGCGTCTTTACCGTCAGGTTCTTTAG

**GlIP-ΔT<sub>3</sub>**

ATGCCATCAGTAGTAGCGCTCGACCTCTGCCAGCTTTTTGACCGGTCCGTCGCTCGGACACCACACC  
AGCTGGCAGTCGATCATGAGAGCGGCTCGCTCACCTATACCGAACTCGATGTGGCCTCATCGAACCT  
GGCCCGAAAGCTAAAGCAAGAAGGAGTAGTCCCTGGGGAAGCGGTCTCTTACTTACTGAGCACGG  
CACCCGGAATGTTGTGCGGCTGCTTGCCATCCTCAAGGCCACGCCTGCTACGTTCTCTGGACCGG  
AGCTCGTGGTCATCAGAGCGGATCCAGGCCGTGCTGGACGGGACAGACAGCCGGATTCTGATCAAC  
ACAACCGTCGAGCCGTTGAAAGCCCGCGGCACAAAGTCATCCATCTGACCAGCGCCGATGTGACG  
ACTCTATCGACGGACCGCAGCACCACAAAGGTCATTCCCAGACATCGCTCCCGAAGACCTCGCTTGTT  
TGATCTTTACCAGTGGGAGCACAGGTGTGCCAAGGGAGTCATGATTCCACATCGTGCCGTAGCCAA  
TTATGCTCAGACCAGTCCATTCAACATGGATGTGCAGCCGGGAGACCGGGTACTGCATATCCTGTGCG  
GTATCCTTTGATGCCTCTACGGGCATGCTGTTTTCCATTCTAGGCAACTCGGGCATCGTGGTCCCCG  
CCACGATGGACACCCTCTTCGACAAAGCGCAGTCCTGCTCCATCCTCGCGTCGACGCCGTCAATCCT  
GGCAACTACCCCTGCCGACGGCCCTGCCAGACAGCTATCCCTACGTCCATACTATTCTGTTGGGT  
GGAGAGTCGCCACCCGCCCGCTGTTGTCCAGCTGGCTTCAATTCGGCGTTCGCATCCTGAACGCG  
TACGGTCTACTGAAACCACCTGTGCCTCGTTGATGCAGGAAGTAGAGGTCTGTGAGGAGACGGGAA  
TGATCAATCGCAGTATTATCGGTGCCCCAATGCCAATGGACCGGTATACCTGCTACAGCCGGATAC  
GCTCCTCCCGGTGCGAGGAAGAAGGCGAGGAAGGGGAGATTGCCATTGCGGGCGTCGGCCTGGCCC  
ACGGCTACTACCGAAATGCCGCACTAACAGCCGAGAAGTTTATCGAGTGGCACGGCAAGCGAGTCTA  
TCGCACCGGCGACCAAGGACGGTGGACACGCCGTAACGACGGCCAGCGCGTGGTGGAAATCCGCG  
GCCGCAGTGATCGCACCGTCAAGAACCAGCGGATTCTCGTCAATCTACCCGCCGATGTGAGGAAC  
CGCTACGCCAGATGGGCTTCGGTGTACCGACGTCTATGCTTCGCTGATCAACGGTCTCTTGGTTGC  
GCTGGTGACCCCGGCAACTGCAGATCTGGACGGCCTGCAGAGCGAGGCGGACCGTCGGCTGTCTT  
CTTTCCATCGGCCGGGACGATACTTGGCTGTGATCAGTTTCCACTGTGAGCCAACGGCAAGATTGA  
TACCAAGGCCATTGAGAACATGCTGAAAGAGTATCAGGCGCGTCTCTGCGAGGGCACCGATGATGAA  
GAGACCACAGGGGGCGAGCGTCTACGGAGCGCGAGCAAGTCATAGCCGAATGCATGTATACCGCG  
TTGGGGTTGGATCTCCCGTCGGCGTCGGCGTCCAAAGATTTCAATTTCTTCGCCATGGGCGGAAACT  
CCCTTGCTGCTCTTCGATTACCTCCCTGTGCCGTGAGCGAGGCATCCTCCTCACTACCCGGGATCT  
GTACCTACATCCAACAGTCAGAGGCATTCTCCCGTATGCTCGTGACCTTGCTCATTCTGGTCTGCCTT  
TGCCAGACAAGGAGGAGCAAATCGACCACCGATTATCCCTCAAGGCCGAGGTTGCTGCGGCCCTTC  
ATCTCTTGGGCGACATTGACGTCGCTCCGTTGACTCCCCTTCAGCTACAACAGCGCTCCTATTTTC  
CAAAGCGATGGGACCAACACGAACCAGCTGCGGCAATCGTATCCCCTGGCCTCGGCCGAGCACATC  
TGCAATGCATGGCGACAGGTCGTCCTCAGTGAACCGGTCTTCCGAACGCAGATTGCGCTGGATATCG  
GGCCCGGTGTGACAGATCGTTCACGCTCAGCCACGGTGCCAGCCGCAGGAGATTACTTTTACCGCC  
GGGAAGACTACAATGCTGCCTTGAGCGATCCTTCCCGTCTGCCGGTTGGACTGGGAATGCGTTTGGA  
ATTTATGAAATTTATGCCGAATGACGACGATGACGACGAGGGTGAAGTGACTGTCGTCTGGACGGCC  
CACCACAGCCTGATCGATGGTTACTCCCTGGGACTCATTCTGGCTCGGGTGCAGCAGGCAAGCCAG  
GGTGTGCGATCCTCCCGGGTCTCTTCTTTGTAGACGCAGCGTGGAACTGCTGAGCGTGCAGAAGC  
AGAGAGACACCGAGGCACGGCGGTTCTGGGAGCAGTATCTGCAGCCGGTACGGTCACTCACGAAAG  
CAGAGGCAACCACAACGCCTGTAGCACGGCCGTACCTCGCTCAGGAGGTGCTGTTCAAGCATGTGG  
GCGGCGTGGACGAGTTACACCGACTCGCATCCAGCTGCAGTGTACCCTAGCGGCCGTCTACTACA  
CGGCGTGGGCCATGACGATTGCTCGGACGACCAAGTCCACCCTGGTAACTCTGGGAGTTGTCTTCTC  
TGGCCGCGAGATCCTCCCAGACGATGCGCAGGCCGTGCGCCCATGATGGCCACTCTGCCCTGGT  
ATGCCGATTGACGGAGAAGCCTCGATTGAGCGCCAGCTGCAGACCACGTTCCGAAGGTTTGGCAAC  
CATTAGCACCTACGCATGGTCTGCCCCAGATCAAATCGGGTACCGGGTCCGACTCTCTGCTGGCGACG  
CAGTATGATTTCCCAACCTACGACCAACCCATCCCGCCGAAAAGGAGCAGTTCTTCGAGAACACGA  
CCTTTGCGCTGAGTCTCCTGGTCAAGCTGATGCTCGTTTTCCGCTTGGTGTACAATCCTTCCGTGCA  
CGGCGAGCAGACGGTCCAGCAATATGCCGACACGTTCCAACAGGCCCTCCAAGCGCTGGTGGGTGA  
TTCGACGATGGAGGCATGGCTCACGGGGCCGACAAAAGCACCGCTTGGCGTCGACCAAGCTTCTGA  
TATCCAACATGTCAATGTACCGAATGTGGCGTCGGCGTTCTATGCCTCGGTGACCTCCACAAGGAT

## SUPPORTING INFORMATION

TTGATTGCCGTAGACGGACCAGGAGGCACGTTACCCTACCGGGAAGTGGATCAAAAGTCGAACGCG  
 GTGGCCTCGCATATTGCCAAACACTTCAGCAGGGCTCAAGTCATCGCCATCCACGCCGATGGAACCC  
 TCAACTGGGTTGTCCGCATCCTGGGTATCCTGAAAGCCGGCTGCGCATACTGCCACTCGATCCTGC  
 GTATCCCATCGCGAGACGGGTGCTGTGTACGAACAAAGCGGTGCCAGCGCGCTCCTCATCCCTAA  
 TGCCTGCTCATCGTCCGCGGCCCTCCTGCCGATAACCGATCTTCGCGTCTTCACGATTCAAGAAACC  
 GAGACAAGCGACACAAGCAGACAGCCATCGCTGCTCGCAAACGCAAATGAGGATGCCCTCATCGTCT  
 TCACCTCCGGCACGACCGGCCGCCCAAGGGGGTCCCCATCAGTCACAGGGGCCTTCTGGCTTTGC  
 AGTCGAATCCCGAAGCCACCATGTTACAGCCGTCCCGGTGCTCGTATAGCTCAGTTCATGTCGCCTGC  
 GTTCGACTACTGTGCCAACGAGATTTTCTCTGCGTTGCTGCATGGCGGAACCTTGGTGCTTCGGGAC  
 CCGTCCGACCCCTTGCCCATCTCGGAAGGTGATGTGTGACAATTACTCCTTCTGTGCTCAGCG  
 TGCTGAATCCAGACGACTATCCTAATCTCGACATGGTCTATGCAACAGGAGAACCCGTCACGCCCGG  
 CTTGCTCGCTCGATGGGGCGAGGGCCGGGCATTCTACAATGCCTATGGTCCTGCAGAGTGCTCTATT  
 TGCACGTCAATTTACCCGCCTAGAGCCCAGCCAGCAGGTACCATCGGAAACGCCGTTTCGCACCGCG  
 CGCATGTACATCCTGGACCCGGATCTCCAGCCCCTGTCGGACGGCCAAACCGGAGAGATCTTCCTG  
 GCCGACAACAGGTGATGCGAGGCTACGTGGGAGACGATGCCAAGACGGCCTACAGCGTGCTGCC  
 GGATCCCTGGCATCCTGGTGAGCGGATGTATCGCACCGGCGACTACGGCTACTGGAACGCGGACAG  
 ACAGATTGTCTACATCGGACGACTGGACCGGCAGGTCAAAATCCGTGGCTTCCGCGTCGAGCTCGC  
 GGCGGTGAGCAGAAGATGTACCAAGAGGAGCCGCGGCTTACCCAAGCGGCGGCTCTCGTTGTCAA  
 CGATACTCTGGTGGCCTTTGTCATGCCGCTTGACGTGGATGTCAGCCGTCTGGAGCAGCGACTGCG  
 CGAGTCCCTCCAACCCAGCTGGGTGCCTCAGGTGATTACCGCGCTGGAGGAGTTCCCTTGACGGC  
 CAACCGCAAGGTTGACTATCGCAAGCTGGCGGAGAGAGCCACCCTGACGCGGCCGGAGGACTCCCT  
 GCCGCAGCAGAAGACGCCAGCAGGGATGACGGCAAAGGATGCTTCTATTGCGGACGGAATCGCAAC  
 CCTGTGGAAGAACGTGCTGCGTCTGCAGGCAGGCGGCGGCTCTCGCAAGCTCTGTGAAGATGATGA  
 CTTCCGTGCTCTGGGCGGCCATTCCGTTCTCCAGATGATGTTGGCGGCTCGCCTCGGCAGCACATTT  
 GGCATCTCCGTGTCGATGCGCGATGTGATCGAGCACTCCACGCTGGCCGAGCAGGTTCGAGCTGGTG  
 CGCCGCAAACGTCAGGCCTCGACGGCCAAGCCACGGACCATCTGCGACGCGTTTCCCGACCACTGC  
 CTGTGCGCGTTGGAGCGTCAGACGTGTTCCAGTACCTGATCGCTGCTGACGTGCGCACGTTCAACA  
 TTCCCGTCCCTTTGCATCTCGGCGGGACATTTGACCGCGACCGTCTCGTGCAAGTCAATCAACGCCGT  
 GTTGGCGTCACGCAAGATCTTCCGGACCAACTTTGTCGAGACATCACTCGGACCGTGTCCGATCTTC  
 CGGGACACGCCGCCCGAGTCCTTGTGTGCGACGGTGCCTCGACACGACCAAGGAGATCGACCG  
 GAGCTTTGACCTGGCTCGGGATGAGCTGATCCGCGTCTTCCTGGACCGTTCGACCCCTCCTTGTGGTT  
 ACCAGCCACGCCGTGCGCGATCTCAACAGCGTGCAGAATCTGCTGCAGGACGTCTCCGGCGTGTAC  
 GCGGGAAGGACGACCCCAACACCGGACCGATGGCACTATCCCCGGGCCCCGGCCTGGTCCCGTCA  
 GGCCACAGAGCAGGAACGGAAGTTCTGGTCAAGTATCTCGAGGGGGCTCCCAGCGTCTGGACAT  
 CCCGCGGTATCCCGGCCAAATGGCGTTTGAAGGCCGCTCGCGCGTGTCCGAGTTCAAAGGCGACCT  
 CGTTCGACGCGCCGTCACCTCTGGGGCAGGAACATGGGTTGAGTCAGCACCAGCTGGTGTGTGCCGC  
 CGTCCGCGCAGACCCTCCAGTGGCTCGCCGGCTCGAACGACGTCGTTCTCGGCTCTCCGTGGGCCAA  
 CCGCGGGCACACCGTGGAGCAAGAGTCGATGGGTCTGTTCCCTCGATCGCCTGCCTCTTCGTTCAA  
 AACCCCTGTGAATGCAGACTGCGCCACCATCCTGCAGTCTACGCGTGCAGCGAGCCAGGCAGCCGT  
 CTGCAATTCATTCCATTTCGAGCAGGTCTGAACCTCCTCCACCTGCCGCGGACCATCCGGCAACAC  
 CCGCTGTTCAAGCCATGGTCACCTTTTCACTCAAGGGGGCAGTGAAGATTGTCTCGCCATCGAGG  
 GGCTGGAGGTGAAACGCGAGATGTGCTTTGCGTCCGGGGCCAAGTTCTGCTCATGTTCAATGGA  
 CCGAGATCGAGGCGGATCACTGGACCCTGCGCATCGAGTATGACGACCACCAGCTCGACGACGCGA  
 CCGTCACCACCATCGAGGACAGCATCCGATGTGTCTCGAAGGGCTGGCGGATCGGCTCTCTCGCG  
 CCGCCATCCACGAGCGCCTCGAGCACCACCACCACCACCTGA

**GlIP- $\Delta C_T$** 

ATGCCATCAGTAGTAGCGCTCGACCTCTGCCAGCTTTTTGACCGGTCCGTCGCTCGGACACCACACC  
 AGCTGGCAGTCGATCATGAGAGCGGCTCGCTCACCTATACCGAACTCGATGTGGCCTCATCGAACCT  
 GGCCCGAAAGCTAAAGCAAGAAGGAGTAGTCCCTGGGGAAAGCGGTCTCTTACTTACTGAGCACGG  
 CACCCGGAATGTTGTGCGCTGCTTGCCATCCTCAAGGCCACGCTGCTACGTTCTCTGGACCGG  
 AGCTCGTGGTCATCAGAGCGGATCCAGGCCGTGCTGGACGGGACAGACAGCCGGATTCTGATCAAC

## SUPPORTING INFORMATION

ACAACCGTCGAGCCGTTTCGAAAGCCCGCGGCACAAAGTCATCCATCTGACCAGCGCCGATGTGACG  
ACTCTATCGACGGACCGCAGCACCAAAAGGTCATTCCCACATCGCTCCCGAAGACCTCGCTTGTT  
TGATCTTTACCAGTGGGAGCACAGGTGTGCCAAGGGAGTCATGATTCCACATCGTGCCGTAGCCAA  
TTATGCTCAGACCAGTCCATTCAACATGGATGTGCAGCCGGGAGACCGGGTACTGCATATCCTGTCCG  
GTATCCTTTGATGCCTCTACGGGCATGCTGTTTTCCATTCTAGGCAACTCGGGCATCGTGGTCCCCG  
CCACGATGGACACCCTCTTCGACAAAGCGCAGTCTGCTCCATCCTCGCGTCGACGCCGTCAATCCT  
GGCAACTACCCCTGCCGACGGCCCTGCCAGACAGCTATCCCTACGTCCATACTATTCTGTTGGGT  
GGAGAGTCGCCACCCGCCCGCTGTTGTCCAGCTGGCTTCAATTCGGCGTTCGCATCCTGAACGCG  
TACGGTCCACTGAAACCACCTGTGCCTCGTTGATGCAGGAAGTAGAGGTCTGTCAGGAGACGGGAA  
TGATCAATCGCAGTATTATCGGTCCGCAATGCCAATGGACCGGTATACCTGCTACAGCCGGATAC  
GCTCCTCCCGTTCGAGGAAGAAGGCGAGGAAGGGGAGATTGCCATTGCGGGCGTCGGCCTGGCCC  
ACGGCTACTACCGAAATGCCGCACTAACAGCCGAGAAGTTTATCGAGTGGCACGGCAAGCGAGTCTA  
TCGCACCGGCGACCAAGGACGGTGGACACGCCGTAACGACGGCCAGCGCGTGGTGGAAATCCGCG  
GCCGAGTGATCGCACCGTCAAGAACCAGCGGATTCTCGTCAATCTACCCGCCGATGTCGAGGAAC  
CGCTACGCCAGATGGGCTTCGGTGTACCGACGTCTATGCTTCGCTGATCAACGGTCTCTTGGTTGC  
GCTGGTGACCCCGGCAACTGCAGATCTGGACGGCCTGCAGAGCGAGGCGGACCGTCGGCTGTCTT  
CTTTCCATCGGCCGGGACGATACTTGGCTGTCGATCAGTTTCCACTGTCAGCCAACGGCAAGATTGA  
TACCAAGGCCATTGAGAACATGCTGAAAGAGTATCAGGCGCGTCTCTGCGAGGGCACCGATGATGAA  
GAGACCACAGGGGGCGAGCGTCTACGGAGCGCGAGCAAGTCATAGCCGAATGCATGTATACCGCG  
TTGGGGTTGGATCTCCCGTCGGCGTCGGCGTCCAAGATTTCAATTTCTTCGCCATGGGCGGAAACT  
CCCTTGCTGCTCTTCGATTACCTCCCTGTGCCGTGAGCGAGGCATCCTCCTCACTACCCGGGATCT  
GTACCTACATCCAACAGTCAGAGGCATTCTCCCGTATGCTCGTGACCTTGCTCATTCTGGTCTGCCTT  
TGCCAGACAAGGAGGAGCAAATCGACCACCGATTATCCCTCAAGGCCGAGGTTGCTGCGGCCCTTC  
ATCTCTTGGGCGACATTGACGTCGCTCCGTTGACTCCCTTCAGCTACAACCTGAGCGCTCCTATTTTC  
CAAAGCGATGGGACCAACACGAACCAGCTGCGGCAATCGTATCCCTGGCCTCGGCCGAGCACATC  
TGCAATGCATGGCGACAGGTCGTCCTCAGTGAACCGGTCTTCCGAACGCAGATTGCGCTGGATATCG  
GGCCCGGTGTGCAGATCGTTCACGCTCAGCCACGGTGCCAGCCGCAGGAGATTACCTTTCACCGCC  
GGGAAGACTACAATGCTGCCTTGAGCGATCCTTCCCGTCTGCCGGTTGGACTGGGAATGCGTTTGA  
ATTTATGAAATTTATGCCGAATGACGACGATGACGACGAGGGTGAAGTGACTGTCGTCTGGACGGCC  
CACCACAGCCTGATCGATGGTTACTCCCTGGGACTCATTCTGGCTCGGGTGCAGCAGGCAAGCCAG  
GGTGTGCGATCCTCCCGGGTCTCTTCTTTGTAGACGCAGCGTGGAATCTGCTGAGCGTGCAGAAGC  
AGAGAGACACCGAGGCACGGCGGTTCTGGGAGCAGTATCTGCAGCCGGTACGGTCACTCACGAAAG  
CAGAGGCAACCACAACGCCTGTAGCACGGCCGTACCTCGCTCAGGAGGTGCTGTTCAAGCATGTGG  
GCGGCGTGGACGAGTTACACCGACTCGCATCCAGCTGCAGTGTACCCTAGCGGCCGCTACTACA  
CGGCGTGGGCCATGACGATTGCTCGGACGACCAAGTCCACCCTGGTAACTCTGGGAGTTGTCTTCTC  
TGGCCGCGAGATCCTCCAGACGATGCGCAGGCCGTCGGCCATTGATGGCCACTCTGCCCTGGT  
ATGCCGATTGACGGAGAAGCCTCGATTGAGCGCCAGCTGCAGACCAGTTCGAAGGTTTGGCAAC  
CATTAGCACCTACGCATGGTCTGCCCCAGATCAAATCGGGTACCGGGTCGACTCTCTGCTGGCGACG  
CAGTATGATTTCCCAACCTACGACCAACCCATCCCGCCGCAAAAGGAGCAGTTCTTCGAGAACACGA  
CCTTTGCGCTGAGTCTCTGGTTCGAAGCTGATGCTCGTTTCCGCTTGGTGTACAATCCTTCCGTGCA  
CGGCGAGCAGACGGTCCAGCAATATGCCGACACGTTCCAACAGGCCCTCCAAGCGCTGGTGGGTGA  
TTCGACGATGGAGGCATGGCTCACGGGGCCGACAAAAGCACCGCTTGCCGTGACCAAGCTTCTGA  
TATCCAACATGTCAATGTACCGAATGTGGCGTCGGCGTTCTATGCCTCGGTGACCTCCACAAGGAT  
TTGATTGCCGTAGACGGACCAGGAGGCACGTTACCCTACCGGGAACCTGGATCAAAGTCAACCGCG  
GTGGCCTCGCATATTGCCAAACACTTCAGCAGGGCTCAAGTCATCGCCATCCACGCCGATGGAACCC  
TCAACTGGGTTGTGGCATCCTGGGTATCCTGAAAGCCGGCTGCGCATACTGCCCACTCGATCCTGC  
GTATCCCATCGCGAGACGGGTGCTGTGTACGAACAAAGCGGTGCCAGCGCGCTCCTCATCCCTAA  
TGCCTGCTCATCGTCCGCGGCCCTCCTGCCGATAACCGATCTTCGCGTCTTACGATTCAAGAAACC  
GAGACAAGCGACACAAGCAGACAGCCATCGCTGCTCGCAAACGCAAATGAGGATGCCCTCATCGTCT  
TCACCTCCGGCACGACCGGCCGCCCAAGGGGGTCCCATCAGTCACAGGGGCCTTCTGGCTTTGC  
AGTCGAATCCCGAAGCCACCATGTTTCAGCCGTCCCGGTGCTCGTATAGCTCAGTTCATGTCGCCTGC  
GTTTCGACTACTGTGCCAACGAGATTTTCTCTGCGTTGCTGCATGGCGGAACCTTGGTGTTCGGGAC

## SUPPORTING INFORMATION

CCGTCCGACCCCTTGCCCATCTCGCGAAGGTTCGATGTGTGTCGACAATTAATCCTTCTGTGCTCAGCG  
 TGCTGAATCCAGACGACTATCCTAATCTCGACATGGTCTATGCAACAGGAGAACCCGTCACGCCCGG  
 CTTGCTCGCTCGATGGGGCGAGGGCCGGGCATTCTACAATGCCTATGGTCCTGCAGAGTGCTCTATT  
 TGCACGTCAATTTACCCGCCTAGAGCCCGGCCAGCAGGTACCATCGGAAACGCCGTTTCGCACCCGCG  
 CGCATGTACATCCTGGACCCGGATCTCCAGCCCGTGTGCGGACGGCCAAACCCGGAGAGATCTTCTG  
 GCCGGACAACAGGTGATGCGAGGCTACGTGGGAGACGATGCCAAGACGGCCTACAGCGTGCTGCC  
 GGATCCCTGGCATCCTGGTGAGCGGATGTATCGCACCCGGCGACTACGGCTACTGGAACGCGGACAG  
 ACAGATTGTCTACATCGGACGACTGGACCCGGCAGGTCAAAATCCGTGGCTTCCGCGTCGAGCTCGC  
 GGCGGTGAGCAGAAGATGTACCAAGAGGAGCCGCGGCTTACCCAAGCGGCGGCTCTCGTTGTCAA  
 CGATACTCTGGTGGCCTTTGTCATGCCGCTTGACGTGGATGTCAGCCGTCTGGAGCAGCGACTGCG  
 CGAGTCCCTCCAACCCAGCTGGGTGCCTCAGGTGATTACCGCGCTGGAGGAGTTCCTTTGGACGGC  
 CAACCCGAAGGTTGACTATCGCAAGCTGGCGGAGAGAGCCACCCTGACGCGGCCGGAGGACTCCCT  
 GCCGCAGCAGAAGACGCCAGCAGGGATGACGGCAAAGGATGCTTCTATTGCGGACGGAATCGCAAC  
 CCTGTGGAAGAACGTGCTGCGTCTGCAGGCAGGCGGCGGCTCTCGCAAGCTCTGTGAAGATGATGA  
 CTTCCGTGCTCTGGGCGGCCATTCCGTTCTCCAGATGATGTTGGCGGCTCGCCTCGGCAGCACATTT  
 GGCATCTCCGTGTCGATGCGCGATGTGATCGAGCACTCCACGCTGGCCGAGCAGGTTCGAGCTGGTG  
 CGCCGCAAACGTCAGGCCTCGACGGCCAAGCCACGGACCATCTGCGACGCGTTTCCCGACCACTGC  
 CTCGAGCACCACCACCACCACACTGA

**GliP-C<sub>T</sub>T<sub>3</sub> only**

ATGCGCGATGTGATCGAGCACTCCACGCTGGCCGAGCAGGTTCGAGCTGGTGCGCCGCAAACGTCAG  
 GCCTCGACGGCCAAGCCACGGACCATCTGCGACGCGTTTCCCGACCACTGCCTGTGCGCGTTGGAG  
 CGTCAGACGTGGTTCCAGTACCTGATCGCTGCTGACGTGCGCACGTTCAACATTCCCGTCCTCTTGC  
 ATCTCGGCGGGACATTTGACCCGCGACCGTCTCGTGCAGTCAATCAACGCCGTGTTGGCGTCACGCAA  
 GATCTTCCGGACCAACTTTGTCGAGACATCACTCGGACCGTGTGCGATCTTCCGGGACACGCCGCC  
 CGAGTCTTGTGTGCGACGGTGGCTCGACACGACCAAGGAGATCGACCCGAGCTTTGACCTGGCT  
 CGGGATGAGCTGATCCGCGTCTTCCCTGGACCGTTCGCACCCTCCTTGTGGTTACCAGCCACGCCGT  
 GCCGATCTCAACAGCGTGCAGAATCTGCTGCAGGACGTCTCCGGCGTGTACGCGGGAAGGACGACC  
 CCAACACCCGACCGATGGCACTATCCCCGGGGCCCCGGCCTGGTCCCCTCAGGCCACAGAGCAGGA  
 ACGGAAGTTCTGGTCAAGTATCTCGAGGGGGCTCCCCAGCGTCTGGACATCCCGCGGTATCCCGG  
 CCAAATGGCGTTTGAAGGCCGCTCGCGCGTGTCCGAGTTCAAAGGCGACCTCGTTTCGACGCGCCGT  
 CACTCTGGGGCAGGAACATGGGTTGAGTCAGCACCAGCTGGTGTGTGCCGCCGTGCGCGAGACCCT  
 CCAGTGGCTCGCCGGCTCGAACGACGTGTTCTCGGCTCTCCGTGGGCCAACCCGCGGGGCACACCG  
 TGGAGCAAGAGTCGATGGGTCTGTTCCCTCGATCGCCTGCCTCTTCGCTTCAAACCCCTGTGAATGC  
 AGACTGCGCCACCATCCTGCAGTCTACGCGTGCAGCGAGCCAGGCAGCCGTCTGCAATTCCATTCC  
 ATTCGAGCAGGTCTGAACCTCCTCCACCTGCCGCGGACCATCCGGCAACACCCGCTGTTTCGAAGC  
 CATGGTCACCTTTTCATCTCAAGGGGGCAGTGAAGATTGTCTCGCCATCGAGGGGCTGGAGGTGAA  
 ACGCGAGATGTGCTTTGCGTCCGGGGCCAAGTTCTGCTCATGTTTCAATGGACCGAGATCGAGGC  
 GGATCACTGGACCCTGCGCATCGAGTATGACGACCACCAGCTCGACGACGCGACCGTCACCACCAT  
 CGAGGACAGCATCCGATGTGTCTCGAAGGGCTGGCGGATCGGCTCTCTCGCGCCGCCATCCACGA  
 GCGCCTGAACGCCATGCACAAGACGGCCAGGACCAAGGTGGATTGGAATTTACCGCCGGCTGGT  
 GGGCATTCTGCAGCGTGAGATGGCGACCTGTCTGGGCGTCTCGCTGGATGAGTTCCCTGCTCCGT  
 CTCCTTCTTCGAGGCCGGCGGCGACTCGATCCAGGCCTGGCGGTTGAGCCGTGAGTTGAAACGGGT  
 TGGGCTGGAGGTGCCCATCTGCAACATCTTCGATCATCCACGGCGCAGGATTTGGCACAGCGTCTT  
 TACCGTCAGGTTCTTTAG

## SUPPORTING INFORMATION

## 2 Supporting Figures

LAEQVELVRRKRQASTAKPRTICDAFPDHCLSPLEPQTFWFQYLIADVRTFNI PVLLHLGGTFDRDRLV  
 QSFNAVLASRKIFRTNFVETSLGPCRIFRDTPPRVLVCDGALDTTKEIDRSFDLARDELIRVFLDRRTL  
 LVVT **SHAVADLNS**VQNLLQDVSGVYAGRTPPTPDRWHYPAPAWSRQATEQERKFWSKYLEGAPQRLDI  
 PRYPGQMAFEGRSRVSEFKGDLVRRAVTLGQEHGLSQHQLVCAAVAQTLQWLAGSNDVVLGSPWANRGH  
 TVEQESMGLFLDRLPLRFKTPVNADCATILQSTRAASQAAVCN SIPFEQVLNLLHLPRITIRQHPLFEAM  
 VTFHLKGAVEDCLAIEGLEVKREMCFASGAKFLLMFEWTEIEADHWTLRIEYDDHQLDDATVTTIEDSI  
 RCVLEGLADRLSRAAIHERLNAMHKTARTKVDWNFYRRLVGI LQREMATCLGVSLDEFPCSVSFFEAGG  
 DSIQAWRLSRQLKRVGLEVPICNIFDHPTAQDLAQRLYRQVL

**Figure S1.** Amino acid sequence of C<sub>T</sub>T<sub>3</sub> domains of GliP (Af293). Residues highlighted in yellow are conserved across C<sub>T</sub> domains.<sup>[13]</sup>

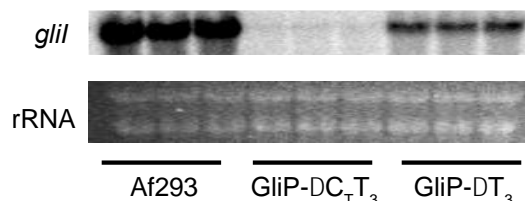

**Figure S2.** *gliI* gene expression in WT(Af293) GliP- $\Delta$ C<sub>T</sub>T<sub>3</sub> and GliP- $\Delta$ T<sub>3</sub> *A. fumigatus* strains.  $10^7$  spores/mL were inoculated in 50 mL liquid GMM and incubated for 72 h at 25 °C, 225 rpm, before total RNA extraction.

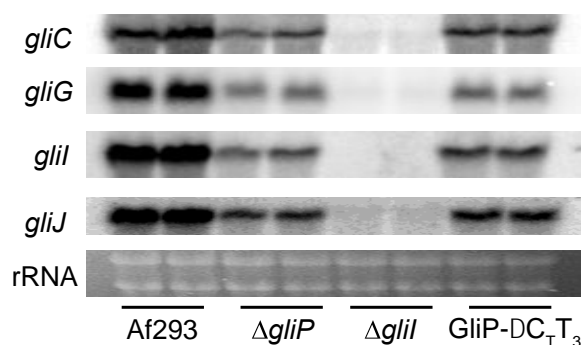

**Figure S3.** Gene expression of *gliC*, *gliG*, *gliI* and *gliJ* in WT(Af293),  $\Delta$ GliP,  $\Delta$ GliI, and GliP- $\Delta$ C<sub>T</sub>T<sub>3</sub> *A. fumigatus* strains.  $10^7$  spores/mL were inoculated in 50 mL liquid GMM and incubated for 24 h at 30 °C, 225 rpm and an additional 24 h at 25 °C, 225 rpm before adding gliotoxin (1, 25 mg/mL). After 24 h of further cultivation at 25 °C, total RNA was isolated from samples for gene expression analysis.

## SUPPORTING INFORMATION

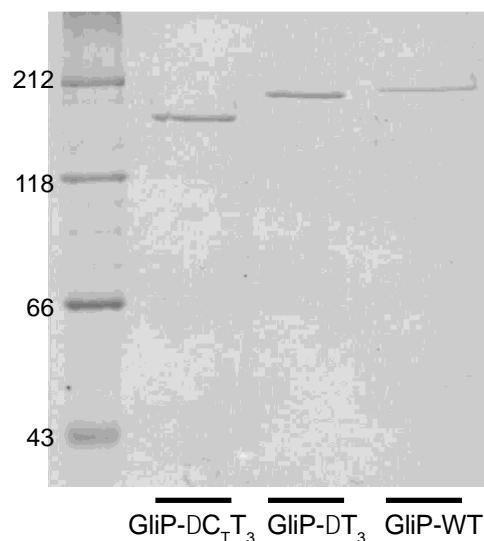

**Figure S4.** SDS-PAGE confirmation of recombinant GliP- $\Delta C_T3$ , GliP- $\Delta T3$ , and GliP-WT.

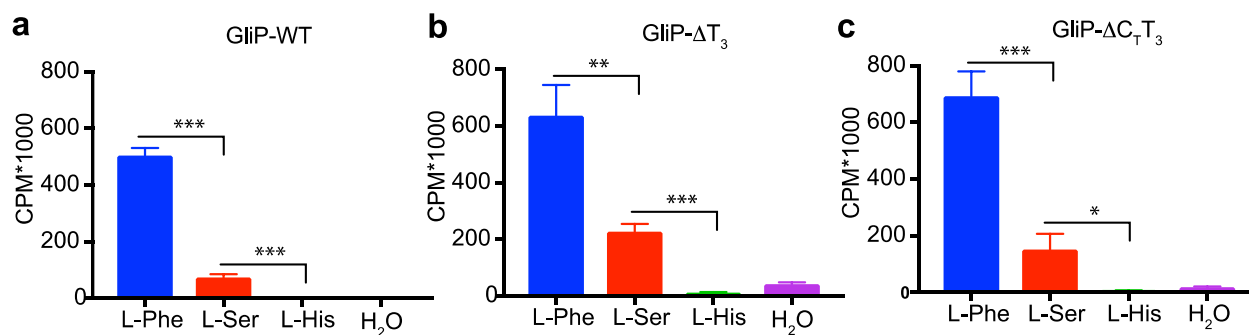

**Figure S5.** ATP- $[^{32}P]$ PP<sub>i</sub>- radioisotope exchange assay results for (a) recombinant GliP-WT, (b) GliP- $\Delta T3$ , and (c) GliP- $\Delta C_T3$ . Shown are raw turnover rates for L-Phe, L-Ser, L-His, and water for each enzyme,<sup>[14]</sup> each assay was run in triplicate and analyzed with a student's *t*-test, \**P* < 0.05, \*\**P* < 0.005, \*\*\**P* < 0.0005.



## SUPPORTING INFORMATION

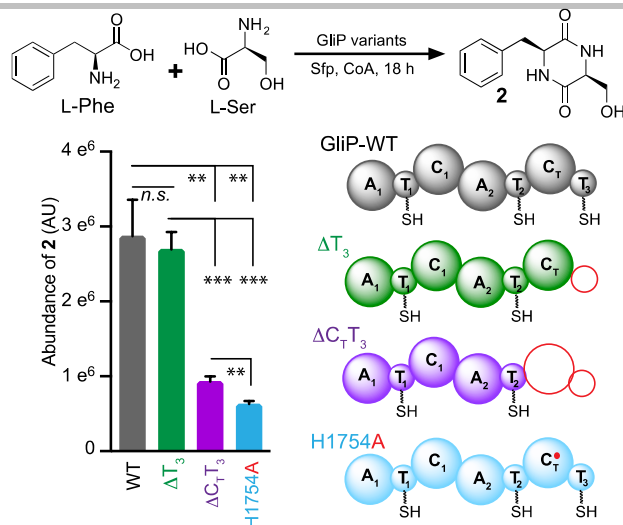

**Figure S6.** *In vitro* product formation assays with GliP. (top) L-Phe and L-Ser incubated with purified GliP variants furnishes **2**. (bottom) Quantification of relative yield of **2** from each assay, as measured by integration of LC-MS ion-chromatograms (n = 4). \*\**p* < 0.01, \*\*\**p* < 0.001.

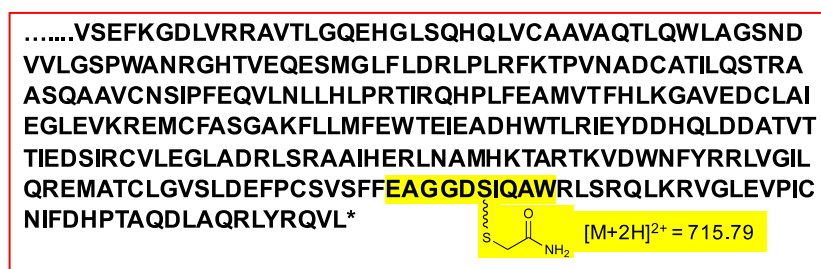

**Figure S7.** LC-HRMS/MS confirmation of phosphopantetheinyl modification of GliP-T<sub>3</sub>. See Supporting Methods for experimental details.<sup>[15]</sup>

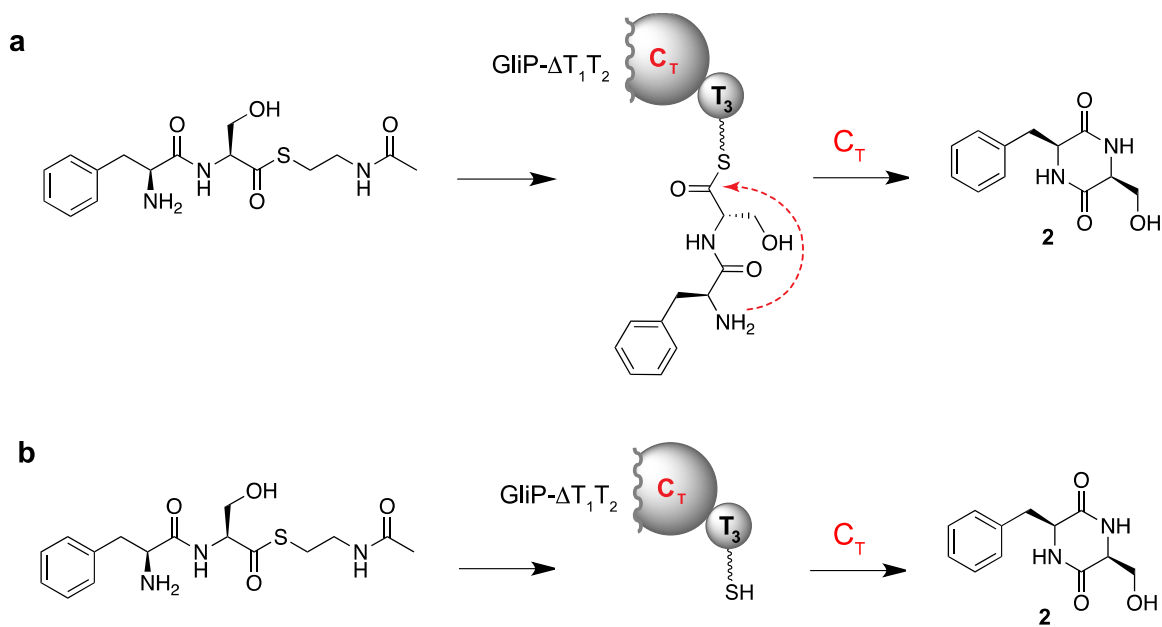

**Figure S8.** *In vitro* cyclization activity of GliP- $\Delta T_1 T_2$  toward **5**. (a) **5** can first be loaded onto  $T_3$  via trans-thiolation, then cyclized by the  $C_T$  domain to form **2**, or (b) the  $C_T$  domain can directly cyclize **5** to form **2**.

## SUPPORTING INFORMATION

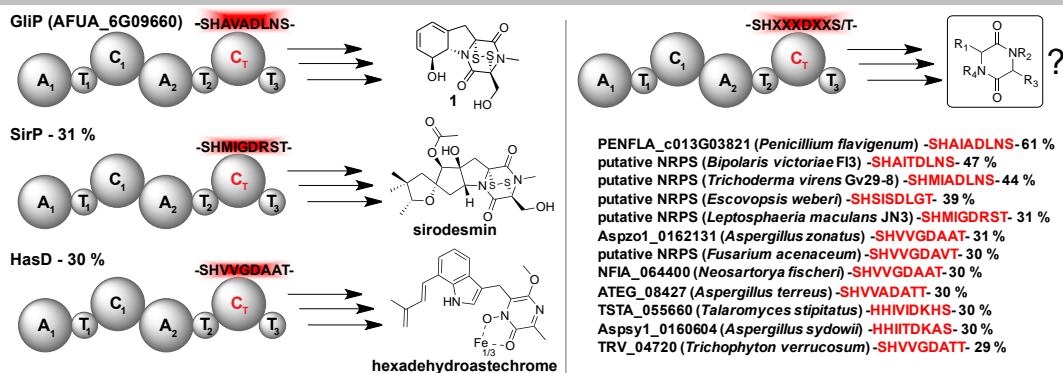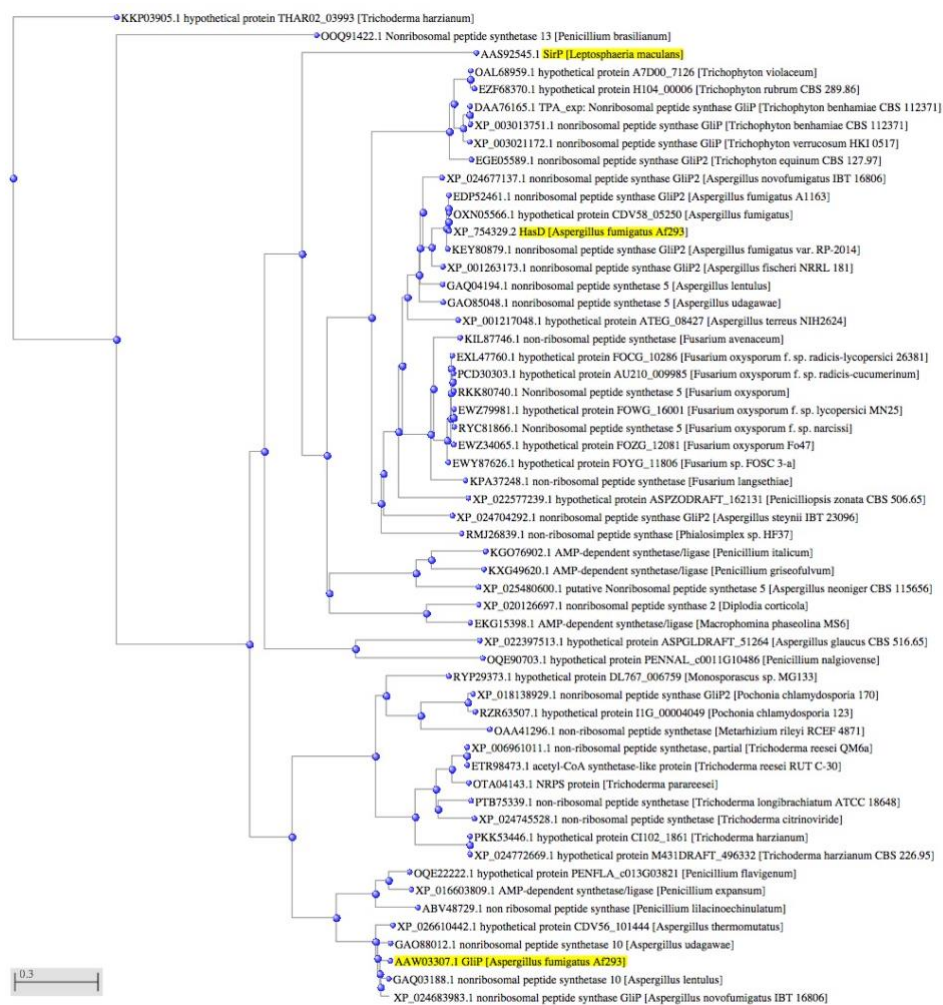

**Figure S9:** Examples for conservation of the C<sub>T</sub> domain in confirmed and putative DKP producing fungal NRPSs. (top) Conserved amino acid sequence in the C<sub>T</sub> domains are highlighted in red text. Percentages are total amino acid similarity. (bottom) Phylogenetic tree for GliP homologs containing C<sub>T</sub>C<sub>1</sub> tandem, see **Supporting Methods 1.13** and **Table S1** for more information. Scale bar is Grishin distance.<sup>[16-18]</sup>

## SUPPORTING INFORMATION

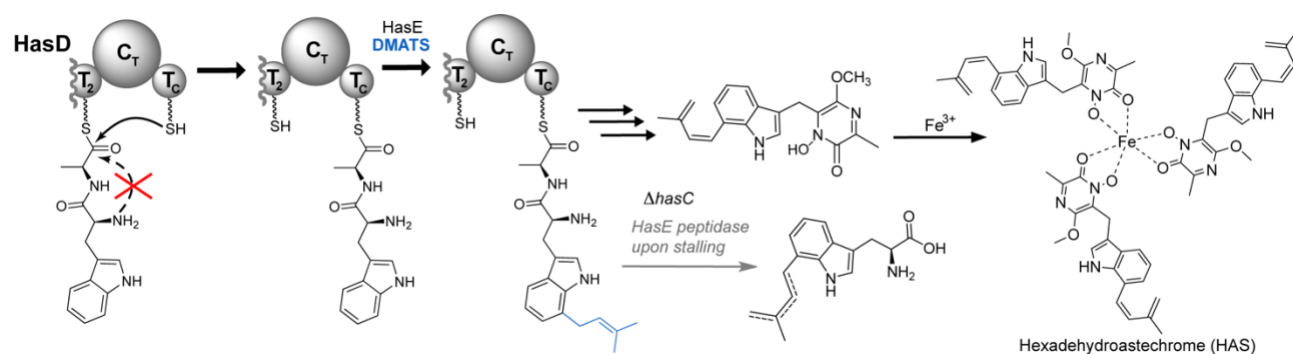

**Figure S10:** Model for hexadehydroastechrome biosynthesis in *Aspergillus fumigatus*. Prenylation of a T<sub>C</sub>-tethered dipeptide (as opposed to prenylation of the cyclized DKP) would explain copious production of prenyltyptophan in  $\Delta hasC$  mutant background (see references 17 and 19). DMATS: dimethylallyltryptophan synthase.<sup>[17,19]</sup>

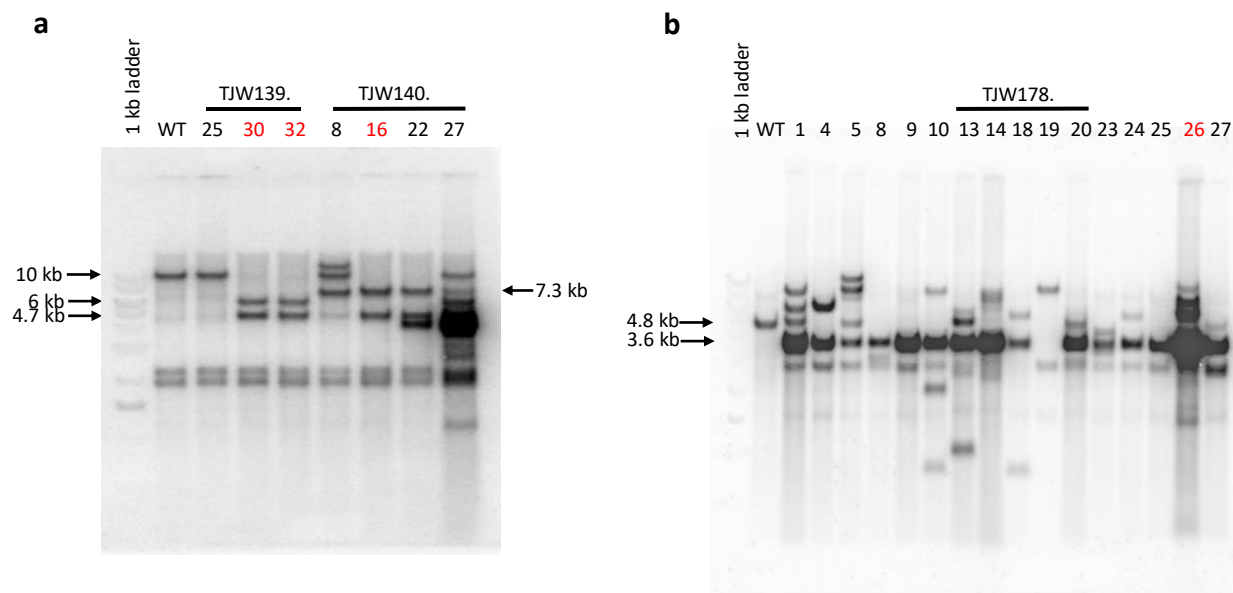

**Figure S11:** Southern confirmation. (a) *A. fumigatus* C<sub>T</sub>3 and T<sub>3</sub> deletion mutants. Genomic DNA was digested by *Nde*I. WT (10 kb), C<sub>T</sub>3 deletion (4.7 and 6 kb) and T<sub>3</sub> deletion (4.7 and 7.3 kb). TJW139.30 and TJW140.16 were chosen for the subsequent experiments. (b) Complementation of C<sub>T</sub>3 deletion mutant. Genomic DNA was digested by *Bam*HI and *Hind*III with 3.6 kb fragment expectation. TJW178.26 was chosen for subsequent experiment.

## SUPPORTING INFORMATION

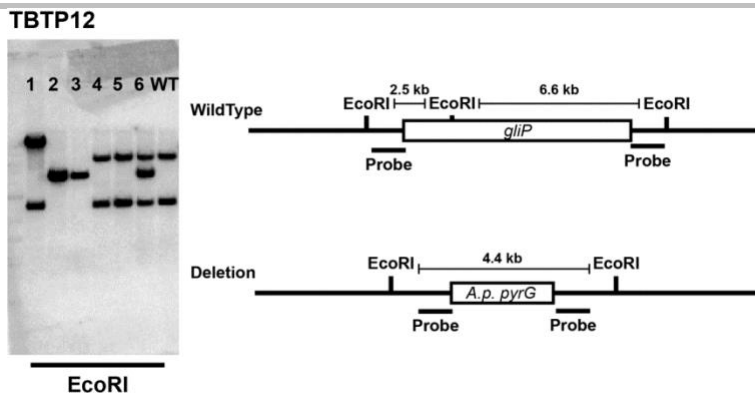

**Figure S12:** Confirmation of *gliP* deletion strain. The GliP open reading frame was replaced with a copy of *pyrG* from *A. parasiticus*. Genomic DNA was digested by *EcoRI*; the wildtype (WT) parental control shows the expected bands of 6.6 and 2.5kb, and transformants 2 and 3 show the expected band size of 4.4kb.

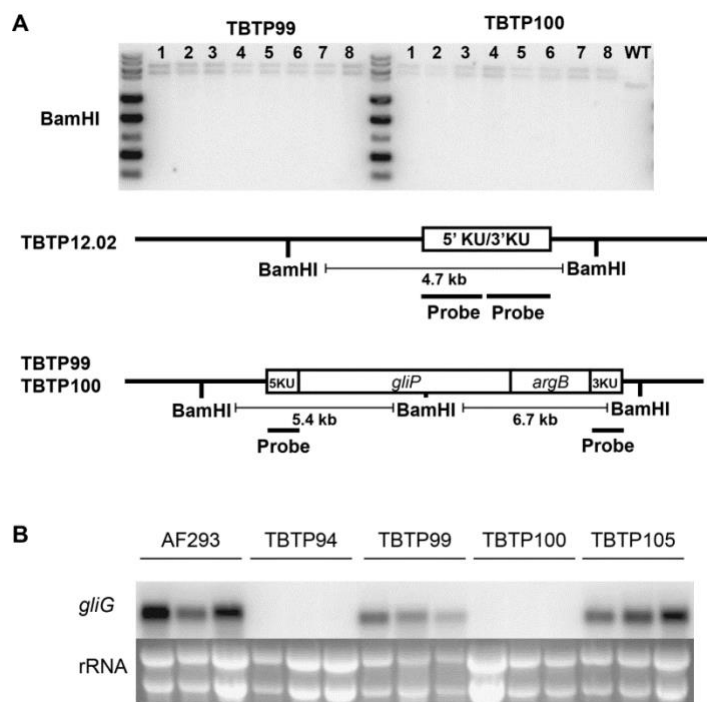

**Figure S13:** Confirmation of *gliP* complementation and cluster expression. (a) Genomic DNA was extracted and digested with *BamHI*; wild-type (WT) parental control shows the expected band of 4.7 kb while all transformants show the expected banding pattern of 6.7 and 5.4 kb. (b) Northern analysis of *gliG* expression in wild-type strains (AF293 & TBTP105) as well as  $\Delta$ *gliP* (TBTP94), *gliP* complement strain (TBTP99) and the *gliP*-H1754A point mutant (TBTP100). Strains were grown in liquid GMM for 72 h at 25 °C at 225 RPM.

## SUPPORTING INFORMATION

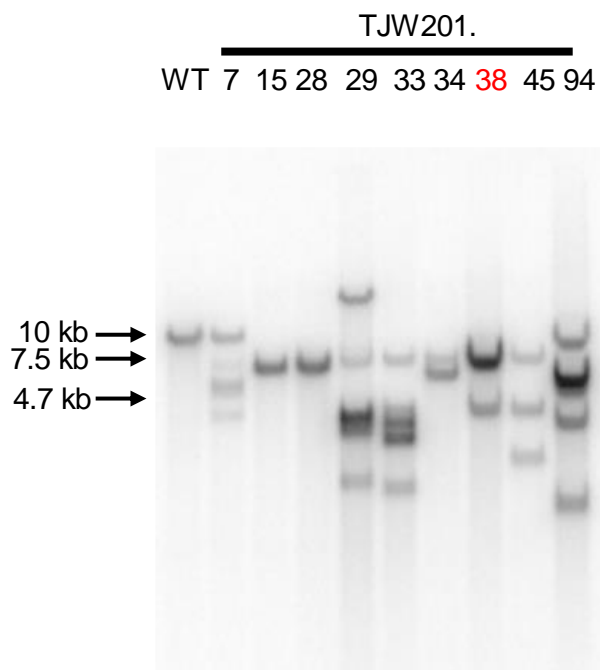

**Figure S14:** Southern confirmation of S2095A point mutant. Genomic DNA was digested by *Nde*I. WT (10 kb), and point mutation (4.7 and 7.5 kb). TJW201.38 was chosen for the subsequent experiments.

### 3 Supporting Tables

**Table S1.** Fungal NRPSs with homologous domain architecture to GliP

| Accession      | Name                                   | Species                                    | [%] similarity |
|----------------|----------------------------------------|--------------------------------------------|----------------|
| GAQ03188.1     | nonribosomal peptide synthetase 10     | <i>Aspergillus lentulus</i>                | 93.192         |
| XP_024683983.1 | nonribosomal peptide synthase GliP     | <i>Aspergillus novofumigatus</i> IBT 16806 | 91.589         |
| GAO88012.1     | nonribosomal peptide synthetase 10     | <i>Aspergillus udagawae</i>                | 88.832         |
| XP_026610442.1 | hypothetical protein CDV56_101444      | <i>Aspergillus thermomutatus</i>           | 87.482         |
| XP_016603809.1 | AMP-dependent synthetase/ligase        | <i>Penicillium expansum</i>                | 60.784         |
| OQE22222.1     | hypothetical protein PENFLA_c013G03821 | <i>Penicillium flavigenum</i>              | 60.492         |

## SUPPORTING INFORMATION

|                |                                                 |                                                   |        |
|----------------|-------------------------------------------------|---------------------------------------------------|--------|
| ABV48729.1     | non ribosomal peptide synthase                  | <i>Penicillium lilacinoechinulatum</i>            | 59.605 |
| RYP29373.1     | hypothetical protein DL767_006759               | <i>Monosporascus sp. MG133</i>                    | 40.071 |
| ETR98473.1     | acetyl-CoA synthetase-like protein              | <i>Trichoderma reesei RUT C-30</i>                | 39.666 |
| XP_006961011.1 | non-ribosomal peptide synthetase, partial       | <i>Trichoderma reesei QM6a</i>                    | 39.666 |
| OTA04143.1     | NRPS protein                                    | <i>Trichoderma parareesei</i>                     | 38.861 |
| PTB75339.1     | non-ribosomal peptide synthetase                | <i>Trichoderma longibrachiatum ATCC 18648</i>     | 38.482 |
| PKK53446.1     | hypothetical protein CI102_1861                 | <i>Trichoderma harzianum</i>                      | 38.28  |
| XP_024772669.1 | hypothetical protein M431DRAFT_496332           | <i>Trichoderma harzianum CBS 226.95</i>           | 38.28  |
| XP_024745528.1 | non-ribosomal peptide synthetase                | <i>Trichoderma citrinoviride</i>                  | 38.279 |
| XP_018138929.1 | nonribosomal peptide synthase GliP2             | <i>Pochonia chlamydosporia 170</i>                | 37.562 |
| RZR63507.1     | hypothetical protein I1G_00004049               | <i>Pochonia chlamydosporia 123</i>                | 37.466 |
| OAA41296.1     | non-ribosomal peptide synthetase                | <i>Metarhizium rileyi RCEF 4871</i>               | 36.233 |
| XP_022397513.1 | hypothetical protein ASPGLDRAFT_51264           | <i>Aspergillus glaucus CBS 516.65</i>             | 31.302 |
| AAS92545.1     | SirP                                            | <i>Leptosphaeria maculans</i>                     | 31.2   |
| XP_022577239.1 | hypothetical protein ASPZODRAFT_162131          | <i>Penicillium zonata CBS 506.65</i>              | 30.66  |
| KGO76902.1     | AMP-dependent synthetase/ligase                 | <i>Penicillium italicum</i>                       | 30.45  |
| KPA37248.1     | non-ribosomal peptide synthetase                | <i>Fusarium langsethiae</i>                       | 30.277 |
| XP_001263173.1 | nonribosomal peptide synthase GliP2             | <i>Aspergillus fischeri NRRL 181</i>              | 30.072 |
| GAO85048.1     | nonribosomal peptide synthetase 5               | <i>Aspergillus udagawae</i>                       | 30.072 |
| XP_025480600.1 | putative Nonribosomal peptide synthetase 5      | <i>Aspergillus neoniger CBS 115656</i>            | 30.062 |
| OQE90703.1     | hypothetical protein PENNAL_c0011G10486         | <i>Penicillium nalgiovense</i>                    | 30     |
| KEY80879.1     | nonribosomal peptide synthase GliP2             | <i>Aspergillus fumigatus var. RP-2014</i>         | 29.991 |
| OXN05566.1     | hypothetical protein CDV58_05250                | <i>Aspergillus fumigatus</i>                      | 29.95  |
| EDP52461.1     | nonribosomal peptide synthase GliP2             | <i>Aspergillus fumigatus A1163</i>                | 29.937 |
| KMK60067.1     | nonribosomal peptide synthase GliP-like protein | <i>Aspergillus fumigatus Z5</i>                   | 29.905 |
| EWZ79981.1     | hypothetical protein FOWG_16001                 | <i>Fusarium oxysporum f. sp. lycopersici MN25</i> | 29.883 |

## SUPPORTING INFORMATION

|                |                                             |                                                            |        |
|----------------|---------------------------------------------|------------------------------------------------------------|--------|
| RYC81866.1     | Nonribosomal peptide synthetase 5           | <i>Fusarium oxysporum f. sp. narcissi</i>                  | 29.883 |
| GAQ04194.1     | nonribosomal peptide synthetase 5           | <i>Aspergillus lentulus</i>                                | 29.878 |
| XP_754329.2    | HasD                                        | <i>Aspergillus fumigatus Af293</i>                         | 29.86  |
| EWY87626.1     | hypothetical protein FOYG_11806             | <i>Fusarium sp. FO5C 3-a</i>                               | 29.835 |
| EKG15398.1     | AMP-dependent synthetase/ligase             | <i>Macrophomina phaseolina MS6</i>                         | 29.786 |
| EWZ34065.1     | hypothetical protein FOZG_12081             | <i>Fusarium oxysporum Fo47</i>                             | 29.758 |
| PCD30303.1     | hypothetical protein AU210_009985           | <i>Fusarium oxysporum f. sp. radicis-cucumerinum</i>       | 29.713 |
| EXL47760.1     | hypothetical protein FOCG_10286             | <i>Fusarium oxysporum f. sp. radicis-lycopersici 26381</i> | 29.668 |
| RKK80740.1     | Nonribosomal peptide synthetase 5           | <i>Fusarium oxysporum</i>                                  | 29.668 |
| XP_020126697.1 | nonribosomal peptide synthase 2             | <i>Diplodia corticola</i>                                  | 29.51  |
| KIL87746.1     | non-ribosomal peptide synthetase            | <i>Fusarium avenaceum</i>                                  | 29.499 |
| XP_001217048.1 | hypothetical protein ATEG_08427             | <i>Aspergillus terreus NIH2624</i>                         | 29.451 |
| RMJ26839.1     | non-ribosomal peptide synthase              | <i>Phialosimplex sp. HF37</i>                              | 29.341 |
| KXG49620.1     | AMP-dependent synthetase/ligase             | <i>Penicillium griseofulvum</i>                            | 29.328 |
| OAL68959.1     | hypothetical protein A7D00_7126             | <i>Trichophyton violaceum</i>                              | 29.255 |
| DAA76165.1     | TPA_exp: Nonribosomal peptide synthase GliP | <i>Trichophyton benhamiae CBS 112371</i>                   | 29.25  |
| XP_003021172.1 | nonribosomal peptide synthase GliP          | <i>Trichophyton verrucosum HKI 0517</i>                    | 29.185 |
| XP_003013751.1 | nonribosomal peptide synthase GliP          | <i>Trichophyton benhamiae CBS 112371</i>                   | 29.061 |
| XP_024677137.1 | nonribosomal peptide synthase GliP2         | <i>Aspergillus novofumigatus IBT 16806</i>                 | 29.04  |
| EGE05589.1     | nonribosomal peptide synthase GliP2         | <i>Trichophyton equinum CBS 127.97</i>                     | 28.799 |
| EZF68370.1     | hypothetical protein H104_00006             | <i>Trichophyton rubrum CBS 289.86</i>                      | 28.798 |
| XP_024704292.1 | nonribosomal peptide synthase GliP2         | <i>Aspergillus steynii IBT 23096</i>                       | 28.444 |
| KKP03905.1     | hypothetical protein THAR02_03993           | <i>Trichoderma harzianum</i>                               | 24.906 |
| OOQ91422.1     | nonribosomal peptide synthetase 13          | <i>Penicillium brasilianum</i>                             | 24.415 |

-NRPSs with >95 % similarity to GliP are excluded from this table, as they likely produce gliotoxin (1).



## SUPPORTING INFORMATION

**Table S2.** LC-HRMS data of reported compounds

| Compound | HR-ESI(+/-)<br>Observed (m/z) | Ion                                  | Calculated Ion<br>Formula                                                    | Calculated m/z | Retention<br>time [min] |
|----------|-------------------------------|--------------------------------------|------------------------------------------------------------------------------|----------------|-------------------------|
| 1        | 263.1030                      | [M-S <sub>2</sub> +H] <sup>+</sup>   | C <sub>13</sub> H <sub>15</sub> N <sub>2</sub> O <sub>4</sub> <sup>+</sup>   | 263.1032       | 5.00                    |
| 2        | 235.1080                      | [M + H] <sup>+</sup>                 | C <sub>12</sub> H <sub>15</sub> N <sub>2</sub> O <sub>3</sub> <sup>+</sup>   | 235.1082       | 2.30                    |
| 3        | 279.0801                      | [M-SCH <sub>3</sub> +H] <sup>+</sup> | C <sub>13</sub> H <sub>16</sub> N <sub>2</sub> O <sub>3</sub> S <sup>+</sup> | 279.0803       | 3.84                    |
| 4        | 309.0906                      | [M + H] <sup>+</sup>                 | C <sub>14</sub> H <sub>18</sub> N <sub>2</sub> O <sub>4</sub> S <sup>+</sup> | 309.0908       | 5.00                    |

**Table S3.** Fungal strains used in this study

| Name      | Genotype                                                                       | Reference  |
|-----------|--------------------------------------------------------------------------------|------------|
| Af293     | Wild type                                                                      | [20]       |
| Af293.1   | <i>A. fumigatus pyrG1</i>                                                      | [20]       |
| Af293.6   | <i>A. fumigatus pyrG1, argB1</i>                                               | [20]       |
| ARC2      | $\Delta gliP::para pyrG1$                                                      | [21]       |
| TJW139.3  | $\Delta C_2T_3 gliP:: para pyrG1$                                              | This study |
| TJW140.16 | $\Delta T_3 gliP:: para pyrG1$                                                 | This study |
| TJW201.38 | <i>GliP2095<sup>ser-&gt;ala</sup>::Afp<sub>pyrG</sub>; pyrG1</i>               | This study |
| TBTP94.1  | <i>pyrG1; <math>\Delta gliP::A.p pyrG1; \Delta akuA</math></i>                 | This Study |
| TBTP99.1  | <i>pyrG1; <math>\Delta gliP::A.p pyrG1; gliP::Af. argB::akuA</math></i>        | This Study |
| TBTP100.6 | <i>pyrG1; <math>\Delta gliP::A.p pyrG1; gliP-H1754A::Af. argB::akuA</math></i> | This Study |
| TFYL44    | <i>pyrG; argB-; <math>\Delta akuA</math></i>                                   | [22]       |
| TBPT12    | <i>pyrG; argB-; <math>\Delta gliP::A.p pyrG; \Delta akuA</math></i>            | This study |
| TBTP94    | <i>pyrG; <math>\Delta gliP::A.p pyrG; \Delta akuA</math></i>                   | This study |
| TBTP99    | <i>pyrG; <math>\Delta gliP::A.p pyrG; gliP::Af. argB::akuA</math></i>          | This study |
| TBTP100   | <i>pyrG; <math>\Delta gliP::A.p pyrG; gliP H1754A::Af. argB::akuA</math></i>   | This study |
| TBTP105   | <i><math>\Delta akuA::A.p. pyrG; pyrG1</math></i>                              | This study |

## SUPPORTING INFORMATION

**Table S4.** PCR primer sets used in this study

| Name       | Sequence (5'-3')                                                 | Purpose                             |
|------------|------------------------------------------------------------------|-------------------------------------|
| DgPCT5'F   | TGGTCTATGCAACAGGAGAACCC                                          | $\Delta C_T T_3$                    |
| DgPCT5'R   | GGGTGAAGAGCATTGTTTGAGGCGACCGGTTCAAACG<br>CGTCGCAGATGGTCCGTGGC    | $\Delta C_T T_3$                    |
| glutapyrGF | TGAACCGGTGCGCTCAAACAATGC                                         | $\Delta C_T T_3$                    |
| glutapyrGR | CTGTCTGAGAGGAGGCACTGATG                                          | $\Delta C_T T_3$                    |
| DgpCT3'F   | GGCATCACGCATCAGTGCCTCCTCTCAGACAGTTCTTCC<br>ACACGGTATACATTGTAGCC  | $\Delta C_T T_3$                    |
| DgPCT3'R   | ATTCGCGAGCTCAACCGCATGG                                           | $\Delta C_T T_3$                    |
| DgPT5'F    | TTGTGAGACATCACTCGGACC                                            | $\Delta T_3$                        |
| DgPT5'R    | GGGTGAAGAGCATTGTTTGAGGCGACCGGTTTCAGCAGG<br>GGAATCATCCAGCGAGACGCC | $\Delta T_3$                        |
| gliPgpdF   | AAAGTCACAGGATCCAAGCTGTAAGGATTCGGCACGG                            | $\Delta C_T T_3$<br>complementation |
| glipgpdR   | GCGTGGAGTGCTCGATCACATCGCGCATTGTGATGTCTG<br>CTCAAGCGGGGTAGCTG     | $\Delta C_T T_3$<br>complementation |
| CTgliPF    | CAGCTACCCCGCTTGAGCAGACATCACAATGCGCGATGT<br>GATCGAGCACTCCACGC     | $\Delta C_T T_3$<br>complementation |
| CTglipR    | CCATGTCAAAGCTTATATCATCTACGCTGGGACGCG                             | $\Delta C_T T_3$<br>complementation |
| gliP 3'-F  | GATAGCACACCCTCGGAATAGTCCTCTCGGCGTTCCATT<br>CGACAGAAGACGAGG       | Deletion                            |
| gliP 3'-R  | CTGGAGCAGCTTCCGTGC                                               | Deletion                            |
| gliP 5'-F  | GAGGCTCTGCTCAGATGAGG                                             | Deletion                            |
| gliP 5'-R  | CGATGATAAGCTGTCAAACATGAGGCAGAGCGTAGGGTT<br>GAGC                  | Deletion                            |
| Ap-pyrG-F  | CTCATGTTTGACAGCTTATCATCG                                         | Deletion                            |
| Ap-pyrG-R  | CCGAGAGGACTATTCCGAGG                                             | Deletion                            |
| YS F       | TTCGCGTACTGACAGCACAGG                                            | Complement                          |
| YS R       | GCAAGACGGCGAGACTGTTCC                                            | Complement                          |
| KU5'-F     | TATTGCCGTTGGATCTTTGGGG                                           | Complement                          |

## SUPPORTING INFORMATION

|                                  |                                                                         |                                            |
|----------------------------------|-------------------------------------------------------------------------|--------------------------------------------|
| KU5'-R                           | GGTATGGATTGTCATCAGCCATAGTGAG                                            | Complement                                 |
| gliP-F                           | TTCTCACTATGGCTGATGACAATCCATACCCGCTCGCCA<br>ATATGCTTGC                   | Complement                                 |
| gliP-R                           | GAAAATTTGTCTTGGATGCAGACCGCGTTCCTGTGACGA<br>ACTCGACGAGG                  | Complement                                 |
| gliP-H1754A-R                    | ACGGCTGCGCTGGTAACCACAAGGAGG                                             | Complement<br>Mutant Copy                  |
| gliP-H1754A-F                    | GCACCCTCCTTGTGGTTACCAGCGCAGCCGTCGCCGAT<br>CTCAACAGCGTG                  | Complement<br>Mutant Copy                  |
| AFU argB fwd                     | GAACGCGGTCTGCATCCAAG                                                    | Complement                                 |
| AFU argB rev                     | TGGTTAGTAACATTCAGACAGTCGGCATGCAGGGACTGA<br>ACCTGGTGAATCG                | Complement                                 |
| KU3'-F                           | GCATGCCGACTGTCTGAATGTTACTAACC                                           | Complement                                 |
| KU3'-R                           | TCACATGTTCTTTCTGCGTTATCCCCTACACCAAGAAGC<br>TCACCACCCC                   | Complement                                 |
| AFU argB rev2                    | AGCATCCATTCTGCGTCTCG                                                    | Complement                                 |
| gliP_S555A_fwd                   | AAGAGCAGCAAGGGCGTTTCCGCCCATGG                                           | SDM of gliP-S555A                          |
| gliP_S555A_rev                   | CCATGGGCGGAAACGCCCTTGCTGCTCTT                                           | SDM of gliP-S555A                          |
| gliP_H1754A_fwd                  | TTGTGGTTACCAGCGCCGCGTCGCCGATC                                           | SDM of gliP-H1754A                         |
| gliP_H1754A_rev                  | GATCGGCGACGGCGGCGCTGGTAACCACAA                                          | SDM of gliP-H1754A                         |
| gliP_S1582A_rev                  | CTGGAGAACGGCATGGCCGCCAGAGC                                              | SDM of gliP-S1582A                         |
| gliP_S1582A_rev                  | GCTCTGGGCGGCCATGCCGTTCTCCAG                                             | SDM of gliP-S1582A                         |
| pET21_gliPC <sub>T</sub> 3_fwd   | CtctagaaataattttgtttaactttaagaaggagatatacatATGCGCGATGT<br><u>GATCGA</u> | Truncation to express gliPC <sub>T</sub> 3 |
| pETet21_gliPC <sub>T</sub> 3_rev | tgtagcagccggatctcagtggtggtggtggtggtgAAGAACCTGACGGT<br><u>AAAGACGCT</u>  | Truncation to express gliPC <sub>T</sub> 3 |
| Ptmt5'F                          | AGTCATTCAACGCCGTGTTGGC                                                  | S2095A mutation                            |

## SUPPORTING INFORMATION

|               |                                                                   |                 |
|---------------|-------------------------------------------------------------------|-----------------|
| Ptmt5'R       | GACGGCTCAACCGCCAGGCCTGGATCGCGTCGCCGCC<br>GGCCTCGAAGAAGGAG         | S2095A mutation |
| Ptmt3'F       | GGCGACGCGATCCAGGCCTGGCGGTTGAGCC                                   | S2095A mutation |
| Ptmtnested5'R | GGTGAAGAGCATTGTTTGAGGGCGACCGGTTCAAAGA<br>ACCTGACGGTAAAGACGCTGTGCC | S2095A mutation |
| PtmtglutpyrGF | CGTCAGGTTCTTTGAACCGGTCGCCTCAAACAATGC                              | S2095A mutation |
| gliGF         | AAAGGTGAGTCGAGTCGACGC                                             | Northern probe  |
| gliGR         | ATACTCTTTCTCGCCATGGCC                                             | Northern probe  |
| gliInF        | TTCGTTGGCACCGCATGCATGG                                            | Northern probe  |
| gliInR        | AGATAGCCGTCCATTTCTGCCC                                            | Northern probe  |
| gliJF         | AAGAGGTACCTCTGATCGACGG                                            | Northern probe  |
| gliJR         | TATCCTCGTTCCACACCTCGTCG                                           | Northern probe  |
| gliCF         | AGTTCTTCCGCAACTCGCACC                                             | Northern probe  |
| gliCR         | AGCCAGGAATGTGTCATCCCG                                             | Northern probe  |

## SUPPORTING INFORMATION

**Table S5.**  $^1\text{H}$  (600 MHz) and  $^{13}\text{C}$  (151 MHz) NMR spectroscopic data for compound **5** in a 80:20 mixture of methanol- $d_4$  : chloroform- $d_3$ .

Chemical shifts were referenced to  $\delta(\text{CHD}_2\text{OD}) = 3.31$  ppm and  $\delta(^{13}\text{C}\text{H}_2\text{OD}) = 49.00$ .  $^{13}\text{C}$  chemical shifts were determined via HMBC, HSQC and direct observation  $^{13}\text{C}$  spectra.  $^1\text{H}$ ,  $^1\text{H}$ - $J$ -coupling constants were determined from the acquired  $^1\text{H}$  or dqfCOSY spectra. HMBC correlations are from the proton(s) stated to the indicated  $^{13}\text{C}$  atom.

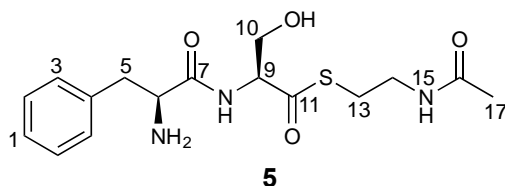

| No. | $\delta_c$ | Proton           | $\delta\text{H}(J_{\text{HH}}[\text{Hz}])$                            | HMBC    |
|-----|------------|------------------|-----------------------------------------------------------------------|---------|
| 1   | 129.28     | 1-H              | 7.24 ( $J_{1,2} = 7.5$ )                                              | 3       |
| 2   | 127.68     | 2- $\text{H}_2$  | 7.21 ( $J_{2,1} = 7.5$ ) ( $J_{2,3} = 7.4$ )                          | 2,4     |
| 3   | 128.92     | 3- $\text{H}_2$  | 7.25 ( $J_{3,2} = 7.4$ ) ( $J_{3,5} = 1.0$ )                          | 1,3,5   |
| 4   | 133.65     |                  |                                                                       |         |
| 5   | 36.87      | 5- $\text{H}_a$  | 2.98 ( $J_{5a,5b} = 14.0$ ) ( $J_{5a,6} = 8.2$ ) ( $J_{5a,3} = 1.0$ ) | 3,4,6,7 |
|     |            | 5- $\text{H}_b$  | 3.28 ( $J_{5b,5a} = 14.0$ ) ( $J_{5b,6} = 5.5$ ) ( $J_{5b,3} = 1.0$ ) | 3,4,6,7 |
| 6   | 54.39      | 6-H              | 4.26 ( $J_{6,5a} = 8.2$ ) ( $J_{6,5a} = 5.5$ )                        | 4,5,7   |
| 7   | 168.86     |                  |                                                                       |         |
| 8   |            | 8-NH             |                                                                       |         |
| 9   | 61.54      | 9-H              | 4.55 ( $J_{9,10a} = 4.0$ ) ( $J_{9,10b} = 4.5$ )                      | 7,10,11 |
| 10  | 61.70      | 10- $\text{H}_a$ | 3.75 ( $J_{10a,10b} = 11.8$ ) ( $J_{10a,9} = 4.0$ )                   | 9,11    |
|     |            | 10- $\text{H}_b$ | 3.84 ( $J_{10b,10a} = 11.8$ ) ( $J_{10b,9} = 4.5$ )                   | 9,11    |
| 11  | 198.19     |                  |                                                                       |         |
| 12  |            |                  |                                                                       |         |
| 13  | 28.44      | 13- $\text{H}_2$ | 2.90 ( $J_{13,14} = 12.0$ )                                           | 11,14   |
| 14  | 38.48      | 15- $\text{H}_2$ | 3.27 ( $J_{14,13} = 12.0$ )                                           | 13,16   |
| 15  |            | 15-NH            |                                                                       |         |
| 16  | 172.01     |                  |                                                                       |         |
| 17  | 22.31      | 17- $\text{H}_3$ | 1.86                                                                  | 16      |

## SUPPORTING INFORMATION

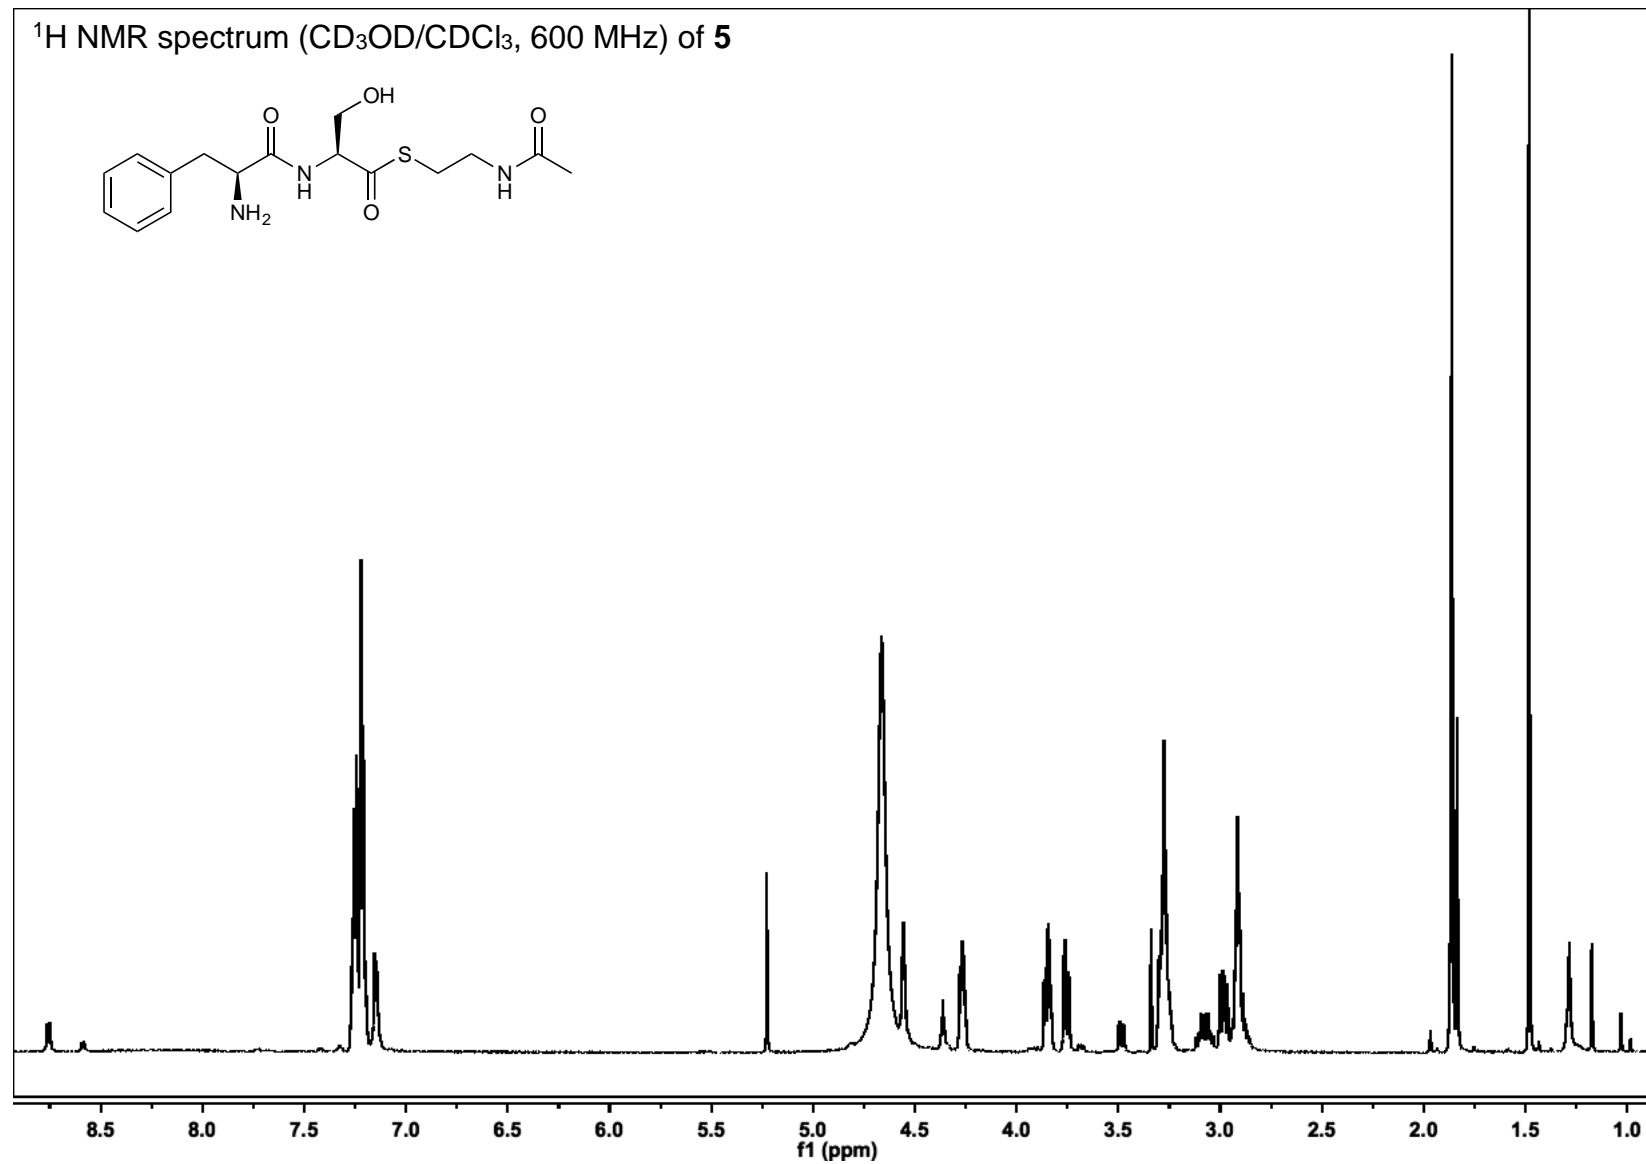

## SUPPORTING INFORMATION

dqfCOSY spectrum (CD<sub>3</sub>OD/CDCl<sub>3</sub>, 600 MHz) of **5**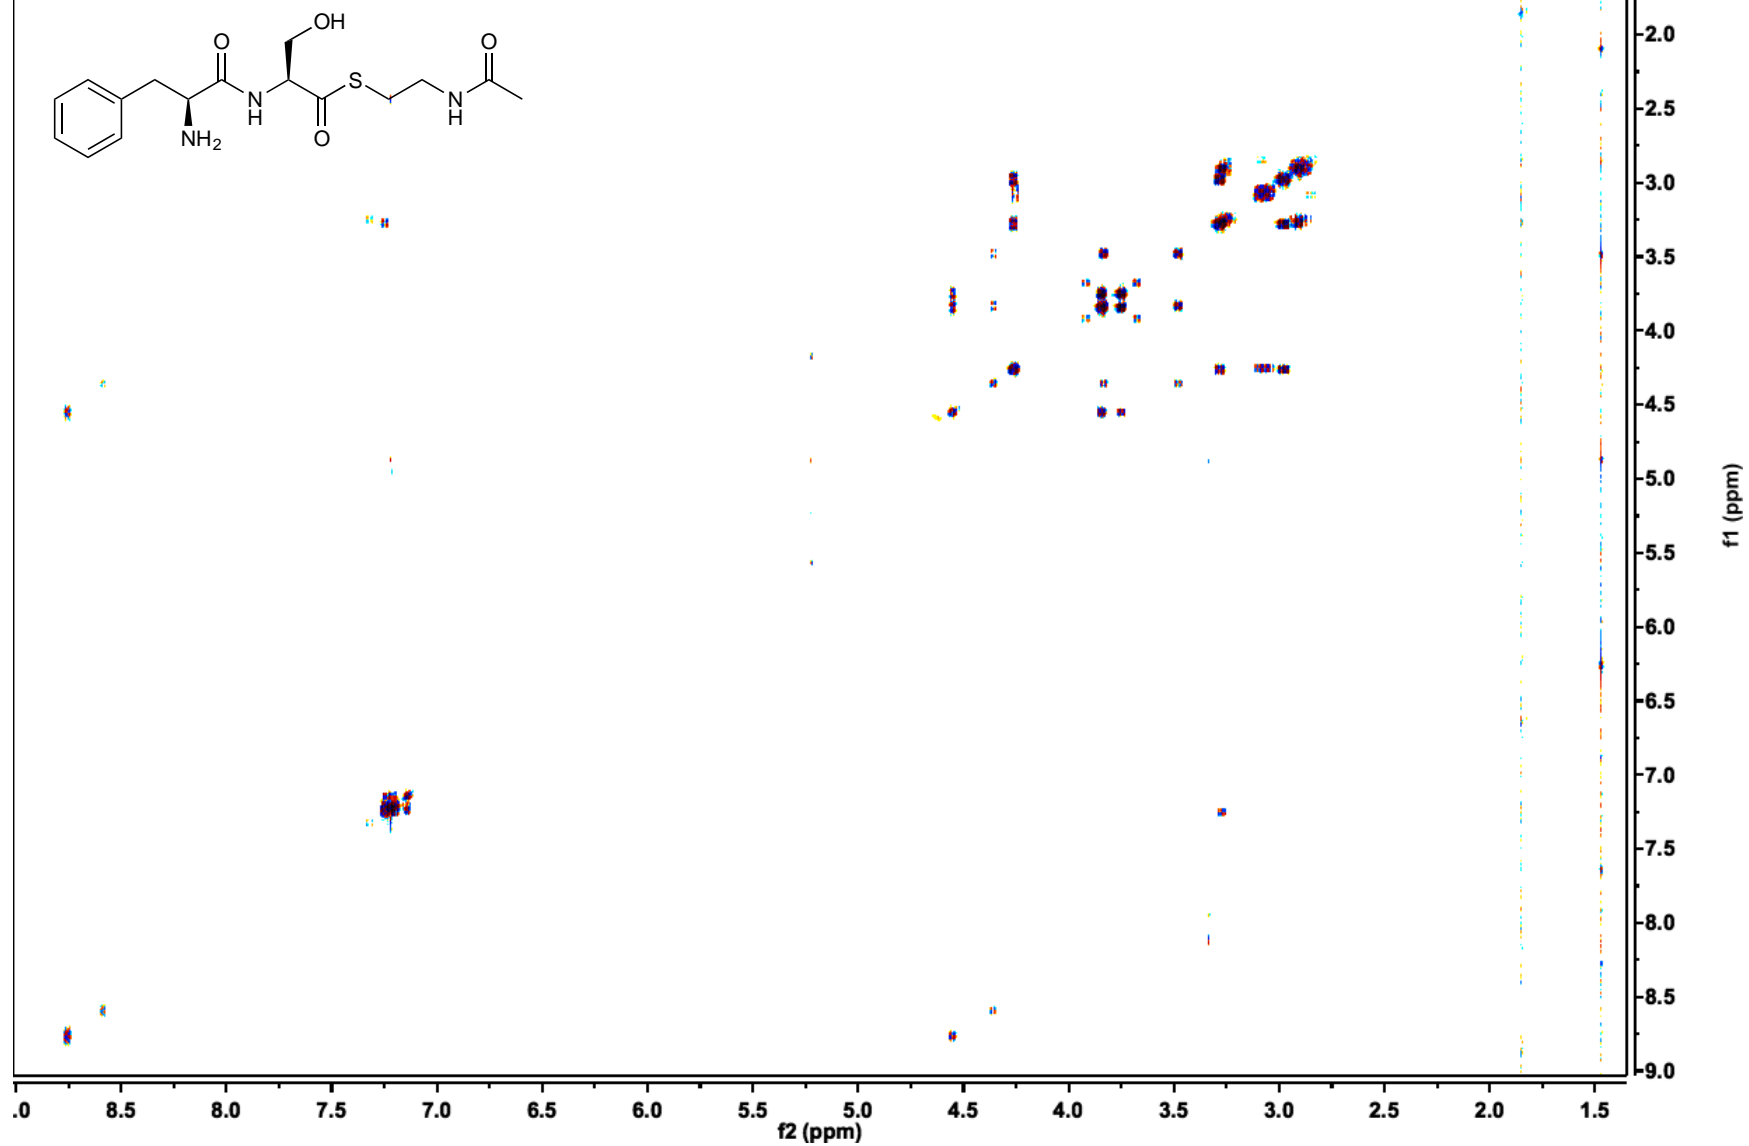

## SUPPORTING INFORMATION

HSQC spectrum (CD<sub>3</sub>OD/CDCl<sub>3</sub>, 600 MHz) of **5**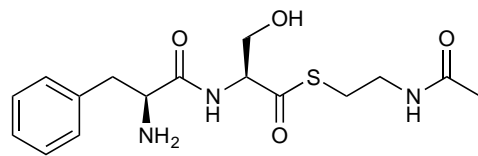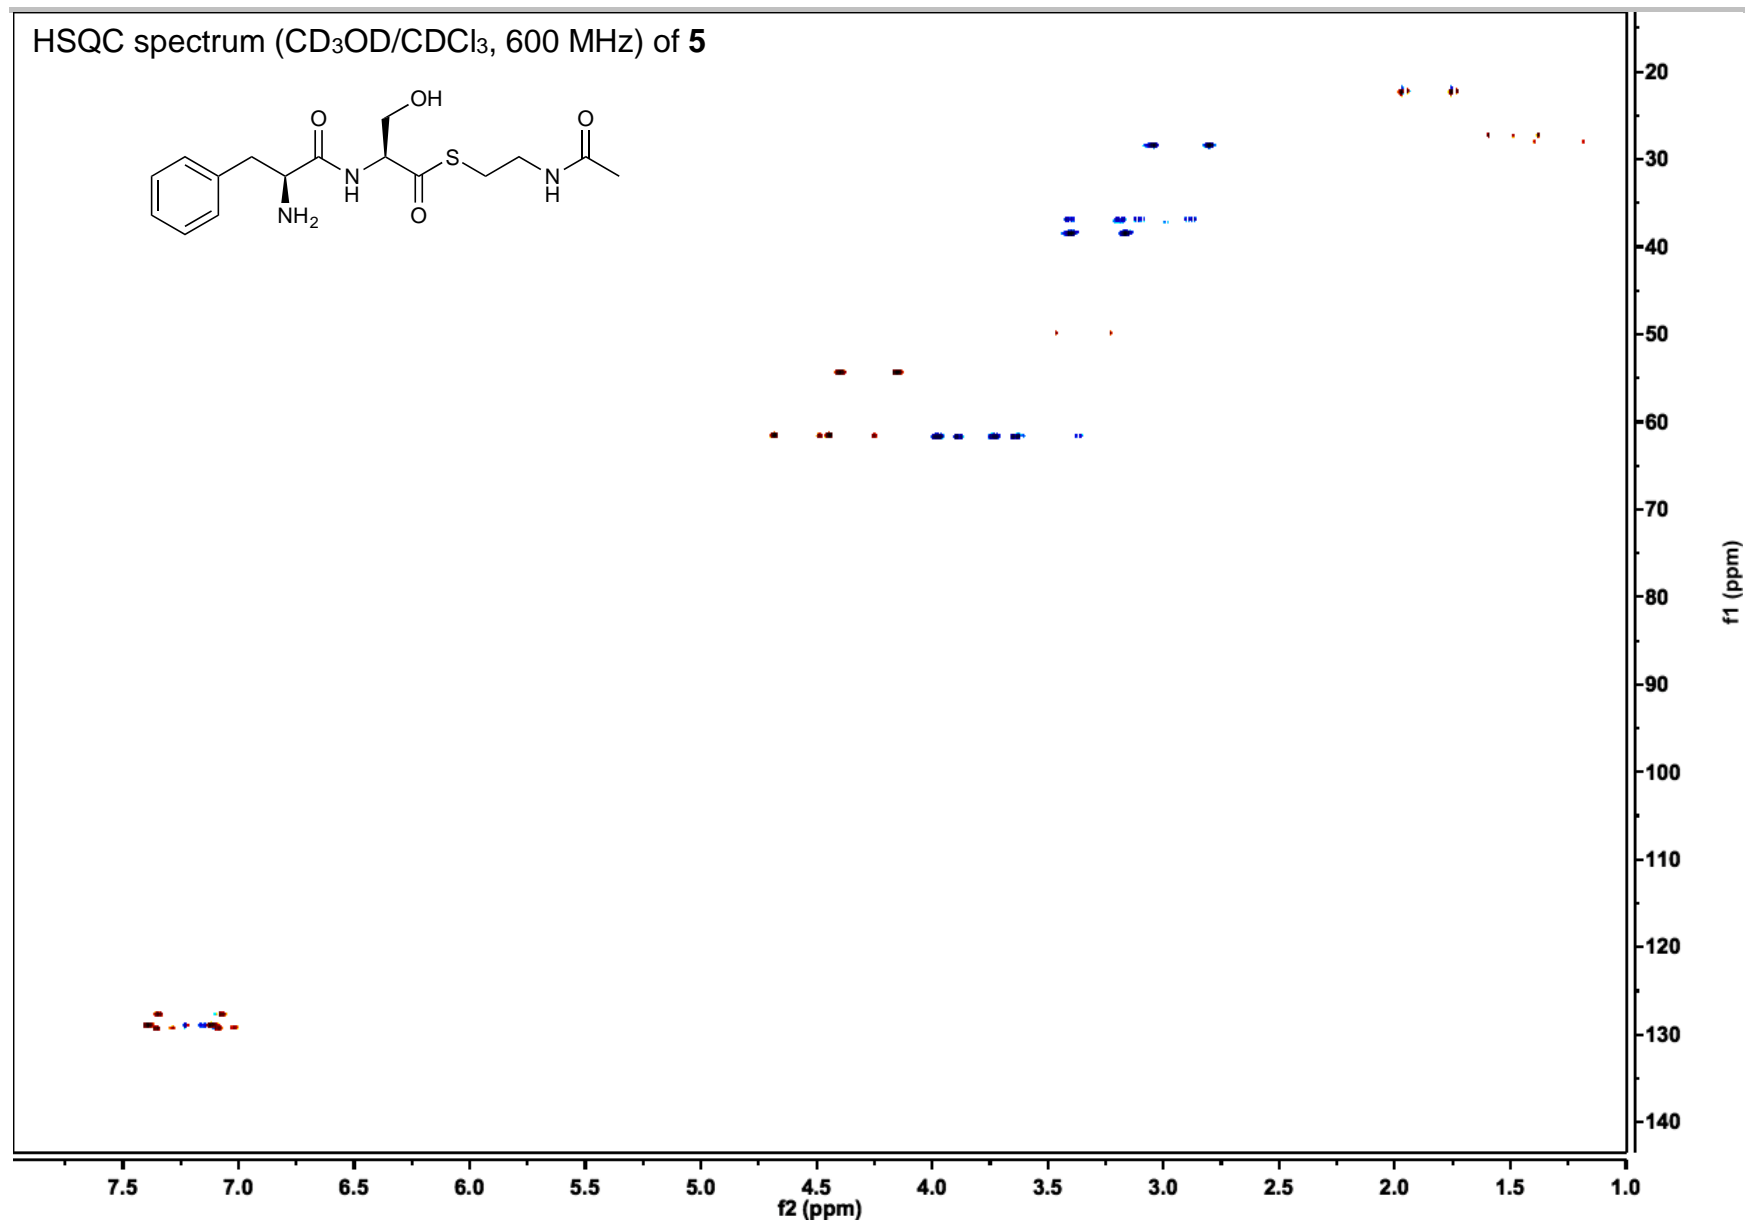



## SUPPORTING INFORMATION

HMBC spectrum (CD<sub>3</sub>OD/CDCl<sub>3</sub>, 600 MHz) of **5**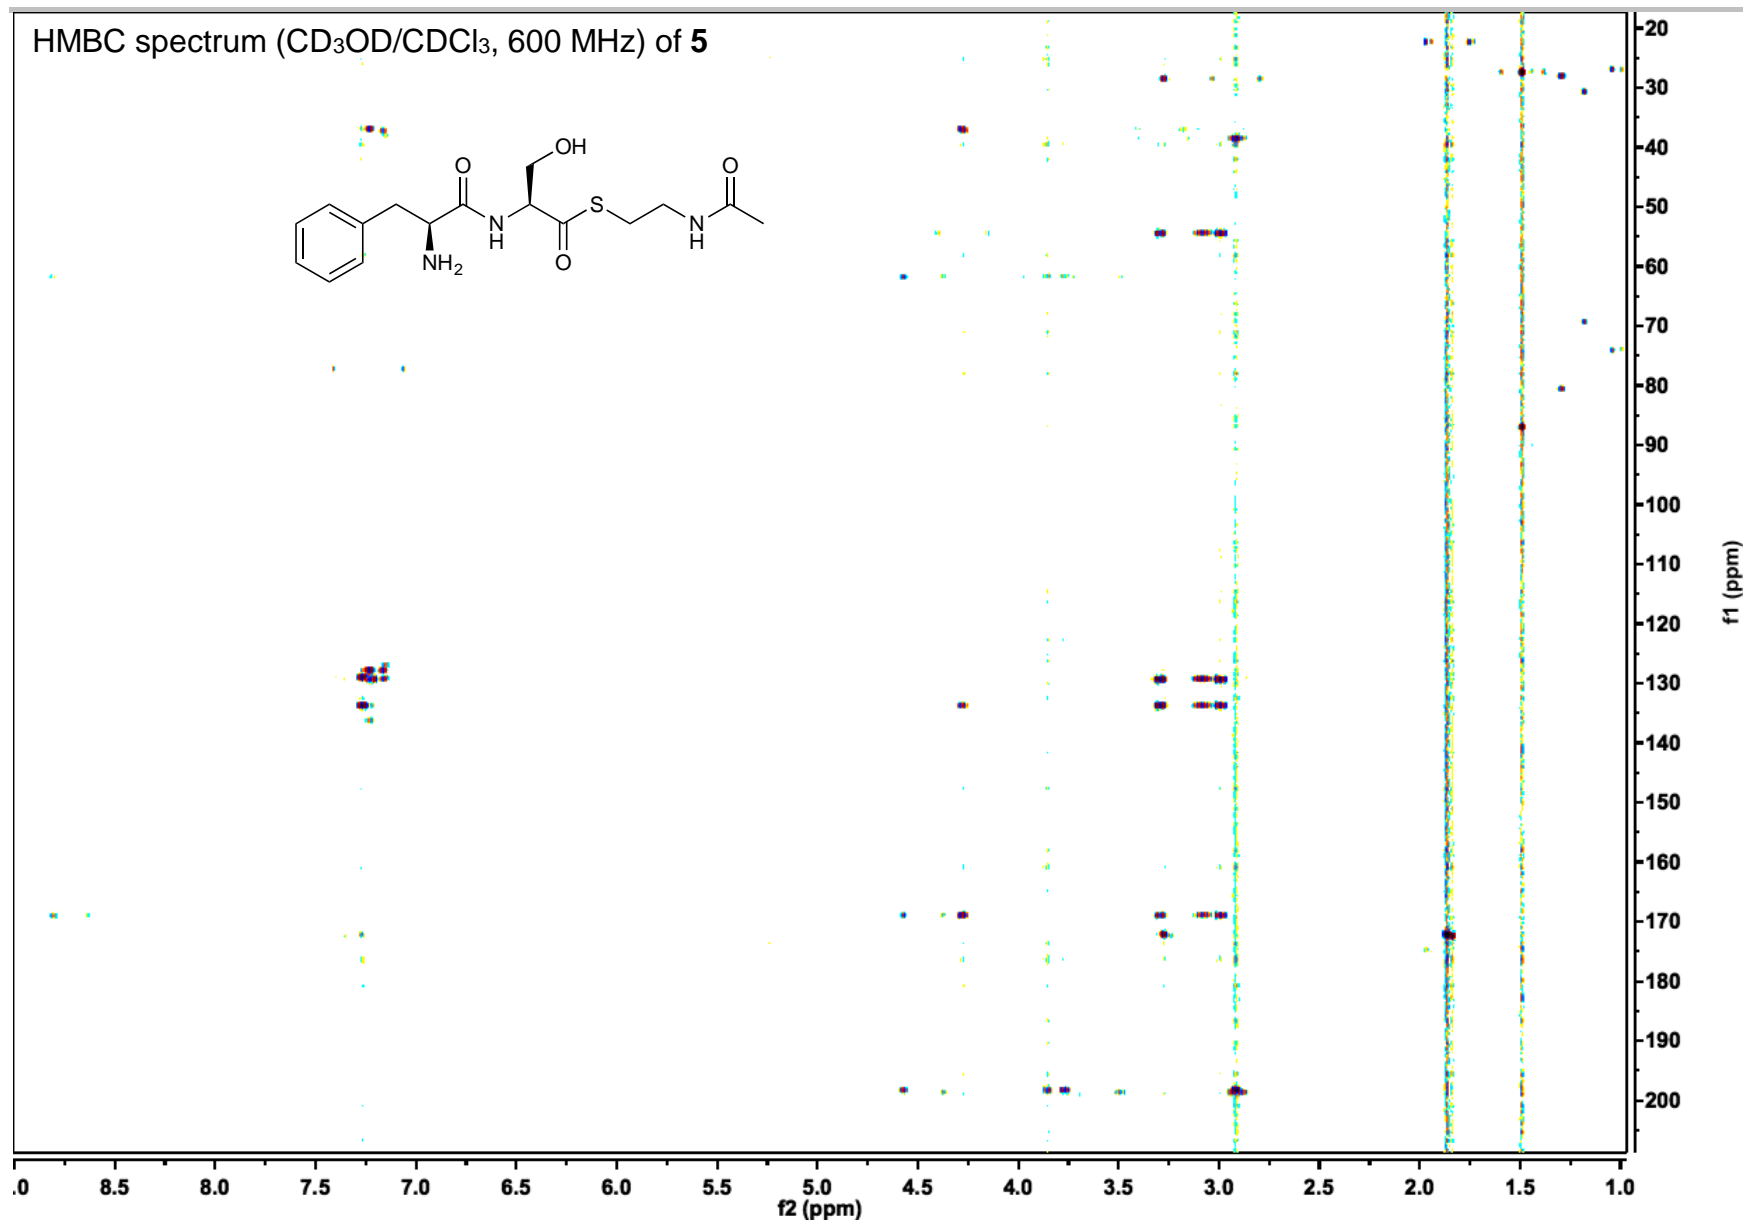

## SUPPORTING INFORMATION

## 4 Supporting References

- [1] J. A. Baccile, J. E. Spraker, H. H. Le, E. Brandenburger, C. Gomez, J. W. Bok, J. Macheleidt, A. A. Brakhage, D. Hoffmeister, N. P. Keller, et al., *Nat Chem Biol.* **2016**, *12*, 419.
- [2] J. W. Bok, A. A. Soukup, E. Chadwick, Y.-M. Chiang, C. C. C. Wang, N. P. Keller, *Mol. Microbiol.* **2013**, *89*, 963.
- [3] A. M. Calvo, J. Bok, W. Brooks, N. P. Keller, *Appl. Environ. Microbiol.* **2004**, *70*, 4733.
- [4] J. W. Bok, N. P. Keller, *Eukaryotic Cell* **2004**, *3*, 527–535.
- [5] J. W. Bok, S. A. Balajee, K. A. Marr, D. Andes, K. F. Nielsen, J. C. Frisvad, N. P. Keller, *Eukaryotic Cell* **2005**, *4*, 1574.
- [6] J.-H. Yu, Z. Hamari, K.-H. Han, J.-A. Seo, Y. Reyes-Domínguez, C. Scazzocchio, *Fungal Genet Biol.* **2004**, *41*, 973.
- [7] C. J. Balibar, C. T. Walsh, *Biochemistry* **2006**, *45*, 15029.
- [8] T. Mamiatis, E. F. Fritsch, J. Sambrook, J. Engel, *Molecular Cloning: A Laboratory Manual.* **1985**.
- [9] J. W. Bok, Y.-M. Chiang, E. Szewczyk, Y. Reyes-Domingez, A. D. Davidson, J. F. Sanchez, H.-C. Lo, K. Watanabe, J. Strauss, B. R. Oakley, et al., *Nat. Chem. Biol.* **2009**, *5*, 462.
- [10] P. Schneider, S. Bouhired, D. Hoffmeister, *Fungal Genet. Biol.* **2008**, *45*, 1487.
- [11] M. E. Due-Hansen, S. K. Pandey, E. Christiansen, R. Andersen, S. V. F. Hansen, T. Ulven, *Org. Biomol. Chem.* **2016**, *14*, 430.
- [12] R. R. Forseth, E. M. Fox, D. Chung, B. J. Howlett, N. P. Keller, F. C. Schroeder, *J. Am. Chem. Soc.* **2011**, *133*, 9678.
- [13] X. Gao, S. W. Haynes, B. D. Ames, P. Wang, L. P. Vien, C. T. Walsh, Y. Tang, *Nat. Chem. Biol.* **2012**, *8*, 1.
- [14] R. R. Forseth, S. Amaiike, D. Schwenk, K. J. Affeldt, D. Hoffmeister, F. C. Schroeder, N. P. Keller, *Angew. Chem. Int. Ed. Engl.* **2012**, *52*, 1590.
- [15] P. C. Dorrestein, S. B. Bumpus, C. T. Calderone, S. Garneau-Tsodikova, Z. D. Aron, P. D. Straight, R. Kolter, C. T. Walsh, N. L. Kelleher, *Biochemistry* **2006**, *45*, 12756.
- [16] <sup>a</sup>G. M. Boratyn, A. A. Schäffer, R. Agarwala, S. F. Altschul, D. J. Lipman, T. L. Madden, *Biol. Direct* **2012**, *7*, 12. <sup>b</sup>N. V. Grishin, *J. Mol. Evol.* **1995**, *5*, 675-679.
- [17] W.-B. Yin, J. A. Baccile, J. W. Bok, Y. Chen, N. P. Keller, F. C. Schroeder, *J. Am. Chem. Soc.* **2013**, *135*, 2064.
- [18] D. M. Gardiner, A. J. Cozijnsen, L. M. Wilson, M. S. C. Pedras, B. J. Howlett, *Mol. Microbiol.* **2004**, *53*, 1307.
- [19] A. Kremer, S. M. Li, *Chem. Biol.* **2008**, *15*, 729.
- [20] T. Xue, C. K. Nguyen, A. Romans, D. P. Kontoyiannis, G. S. May, *Arch. Microbiol.* **2004**, *182*, 346.
- [21] R. A. Cramer, M. P. Gamcsik, R. M. Brooking, L. K. Najvar, W. R. Kirkpatrick, T. F. Patterson, C. J. Balibar, J. R. Graybill, J. R. Perfect, S. N. Abraham, et al., *Eukaryotic Cell* **2006**, *5*, 972.
- [22] K. Throckmorton, P. Wiemann, N. P. Keller, *Toxins (Basel)* **2015**, *7*, 3572.

Main text reference #25: K. D. Clevenger, R. Ye, J. W. Bok, P. M. Thomas, M. N. Islam, G. P. Miley, M. T. Robey, C. Chen, K. Yang, M. Swyers, E. Wu, P. Gao, P.M. Thomas, C.C. Wu, N.P. Keller, N.P. Kelleher, *ACS Chem. Biol.* **2018**, *57*, 3237.

Main text reference #26: M. T. Robey, R. Ye, J. W. Bok, K. D. Clevenger, M. N. Islam, C. Chen, Gupta, M. Swyers, E. Wu, P. Gao, P.M. Thomas, C.C. Wu, N.P. Keller, N.L. Kelleher, *Biochemistry* **2018**, *13*, 1142.
